# Supplementary material for: The health impacts of blood donation: a systematic review of donor and non-donor perceptions
Source: PubMed Central journal article supplement — Blood Transfus. 2023 Jul 27;22(1):7–19. doi: 10.2450/BloodTransfus.494 (PMC10812890; doi:10.2450/bloodtransfus.494), 2024-01
Supplement: BLT-22-007_Onlinesupplementarycontent.pdf [file BLT-22-007_Onlinesupplementarycontent.pdf]

**ONLINE SUPPLEMENTARY CONTENT**

**Table S1 – Details of included studies (N=247)**

| Data file ID | Study                        | Participants                                     | Continent     | Study Design       | Health perception focus | Donation status               | Health perceptions measure | Perception type & valence                                            | Results category* |
|--------------|------------------------------|--------------------------------------------------|---------------|--------------------|-------------------------|-------------------------------|----------------------------|----------------------------------------------------------------------|-------------------|
| 3914         | Abderrahman et al. (2014)(1) | Female 15.6%<br><40 yrs 90.8%<br>FT donor 25.4%  | Africa        | Quantitative       | Background              | Whole blood; donor            | Study specific             | Belief – negative                                                    | 6                 |
| 4421         | Abera et al. (2017)(2)       | Female 43.0%<br>Age NR<br>FT donor NR            | Africa        | Quantitative       | Background              | Whole blood; donor, non-donor | Study specific             | Belief – negative<br>Belief – uncategorized<br>Experience – negative | 1, 3, 4<br>8<br>3 |
| 4375         | Abolfourh et al. (2014)(3)   | Female 30.9%<br><40 yrs 48.8%<br>FT donor 15.7%  | Asia          | Quantitative       | Background              | Whole blood; donor, non-donor | Study specific             | Belief – negative                                                    | 4, 6              |
| 3458         | Agrawal et al. (2013)(4)     | Female 23.0%<br>Age NR<br>FT donor NR            | Asia          | Quantitative       | Background              | Whole blood; donor, non-donor | Study specific             | Belief – negative                                                    | 2, 3, 6           |
| 3256         | Ahmed et al. (2020)(5)       | Female 44.2%<br>M Age 21.7 yrs<br>FT donor NR    | Asia          | Quantitative       | Background              | Whole blood; donor, non-donor | Study specific             | Belief – positive<br>Belief – negative                               | 8<br>6, 8         |
| 3342         | Alam et al. (2004)(6)        | Female NR<br><40 yrs 89.6%<br>FT donor 73.2%     | Asia          | Quantitative       | Background              | Whole blood; donor, non-donor | Study specific             | Belief – positive<br>Belief – negative                               | General<br>6      |
| 2711         | Alanzi et al. (2019)(7)      | Female 46.0%<br><40 yrs 65.0%<br>FT donor 36.0%  | Asia          | Quantitative       | Background              | Whole blood; donor, non-donor | Study specific             | Belief – positive<br>Belief – negative                               | General<br>6, 11  |
| 3028         | Allieri S1 (2017)(8)         | Female 52.0%<br>Age NR<br>FT donor NR            | Europe        | Qualitative        | Background              | Whole blood; non-donor        | Study specific             | Belief – negative                                                    | 6                 |
| 86954        | Alfouzan (2014)(9)           | Female 53.9%<br><40 yrs 50.7%<br>FT donor NR     | Asia          | Quantitative       | Background              | Whole blood; donor, non-donor | Study specific             | Belief – negative                                                    | General           |
| 2979         | Alharbi et al. (2018)(10)    | Female 38.4%<br>M Age 30.0 yrs<br>FT donor NR    | Asia          | Quantitative       | Background              | Whole blood; donor, non-donor | Study specific             | Belief – positive                                                    | 7, 9              |
| 3294         | Al-Johar et al. (2016)(12)   | Female 100.0%<br>Age NR<br>FT donor NR           | Asia          | Quantitative       | Background              | Whole blood; not specified    | Study specific             | Belief – negative                                                    | 6                 |
| 2888         | Alva et al. (2019)(11)       | Female 3.0%<br><40 yrs 43.9%<br>FT donor NR      | South America | Quantitative       | Background              | Whole blood; donor, non-donor | Study specific             | Belief – positive                                                    | General, 4, 7, 9  |
| 86953        | Amatya (2013)(13)            | Female 58.8%<br>M Age 20.5 yrs<br>FT donor 68.8% | Asia          | Quantitative       | Background              | Whole blood; donor, non-donor | Study specific             | Belief – negative                                                    | 3, 4, 6, 7, 11    |
| 54246        | Amatya et al. (2012)(14)     | Female 40.4%<br>M Age 20.2 yrs<br>FT donor NR    | Asia          | Quantitative       | Background              | Whole blood; donor, non-donor | Study specific             | Belief – negative<br>Experience – negative                           | 3, 6<br>10        |
| 2227         | Ambati et al. (1997)(15)     | Female 31.6%<br><40 yrs 78.4%<br>FT donor NR     | Asia          | Quantitative       | Background              | Whole blood; not specified    | Study specific             | Belief – negative                                                    | 6                 |
| 1480         | Anderson et al. (1999)(16)   | Female 57.1%<br>Age NR<br>FT donor NR            | North America | Mixed; Qualitative | Background              | Plasma; donor                 | Focus groups/ interviews   | Belief – negative<br>Experience – negative                           | General, 2<br>3   |
| 1529         | Anwer et al. (2016)(17)      | Female 54.2%<br><40 yrs 65.4%<br>FT donor NR     | Asia          | Quantitative       | Background              | Whole blood; donor, non-donor | Study specific             | Belief – negative                                                    | 6                 |

continued on next page

Table S1 - Details of included studies (N=247) - follows from previous page

| Data file ID | Study                                | Participants                                     | Continent     | Study Design | Health perception focus | Donation status                   | Health perceptions measure                          | Perception type & valence                                        | Results category*                                       |
|--------------|--------------------------------------|--------------------------------------------------|---------------|--------------|-------------------------|-----------------------------------|-----------------------------------------------------|------------------------------------------------------------------|---------------------------------------------------------|
| 86952        | Ariffin et al. (2017)(18)            | Female 74.2%<br>M Age 22.1 yrs<br>FT donor NR    | Asia          | Quantitative | Background              | Whole blood; donor, non-donor     | Amatya (2012)                                       | Experience - negative                                            | 3, 10, 11, 12                                           |
| 947 & 955    | Asamoah-Akuoko (2018 & 2021)(19, 20) | Female 36.7%<br><40 yrs 40.6%<br>FT donor 23.0%  | Africa        | Mixed        | Background              | Whole blood; donor, non-donor     | Focus groups/ interviews                            | Belief - positive<br>Belief - negative<br>Belief - uncategorised | General<br>General, 1, 2, 3, 5, 6, 8, 9, 10, 11, 12, 14 |
| 907          | Asenso-Mensah et al. (2014)(21)      | Female 24.6%<br>Age NR<br>FT donor 79.1%         | Africa        | Quantitative | Background              | Whole blood; donor                | Study specific                                      | Belief - negative                                                | General                                                 |
| 472          | Asmawi et al. (2019)(22)             | Female 54.0%<br><40 yrs 99.0%<br>FT donor NR     | Asia          | Qualitative  | Background              | Whole blood; non-donor            | Focus groups                                        | Belief - negative                                                | 2, 6                                                    |
| 239          | Atherley et al. (2016)(23)           | Female 60.3%<br><40 yrs 27.3%<br>FT donor NR     | North America | Quantitative | Background              | Whole blood; donor, non-donor     | Study specific                                      | Belief - negative                                                | 6                                                       |
| 232          | Atif et al. (2019)(24)               | Female 2.8%<br><40 yrs 76.8%<br>FT donor NR      | Asia          | Quantitative | Background              | Whole blood; donor                | Study specific                                      | Belief - negative                                                | 2, 3                                                    |
| 9769         | Bagot et al. (2013)(25)              | Female 33.3%<br>M Age 46.0 yrs<br>FT donor NR    | Oceania       | Qualitative  | Background              | Mixed; donor (inc. lapsed plasma) | Focus groups                                        | Belief - negative<br>Experience - negative                       | General<br>11, 12                                       |
| 9755         | Bagot et al. (2015)(26)              | Female 42.5%<br>M Age 38.5 yrs<br>FT donor 25%   | Oceania       | Qualitative  | Background              | Mixed; donor                      | Interviews                                          | Belief - negative                                                | General, 3                                              |
| 9519         | Baig et al. (2013)(27)               | Female 0.0%<br>M Age 22.0 yrs<br>FT donor 67.7%  | Asia          | Quantitative | Background              | Whole blood; donor, non-donor     | Interviews                                          | Belief - negative                                                | General, 3, 4, 6                                        |
| 9655         | Bani et al. (2014)(30)               | Female 38.0%<br>M 41.2 yrs<br>FT donor NR        | Europe        | Quantitative | Background              | Whole blood; lapsed donor         | Study specific                                      | Belief - negative                                                | 10                                                      |
| 9635         | Bankole et al. (2008)(31)            | Female 38.7%<br>M Age 39.7 yrs<br>FT donor NR    | Africa        | Quantitative | Background              | Whole blood; not specified        | Study specific                                      | Belief - negative                                                | 6                                                       |
| 8431         | Bastani et al. (1996)(32)            | Female 55.7%<br><40 yrs 52.2%<br>FT donor NR     | North America | Quantitative | Background              | Whole blood; not specified        | Study specific                                      | Belief - negative                                                | 6                                                       |
| 8362         | Bathia et al. (2013)(33)             | Female 35.6%<br>M Age 19.9 yrs<br>FT donor NR    | Africa        | Quantitative | Background              | Whole blood; not specified        | Sabu et al. (2011); Javazadeh Shahshahmehal, (2006) | Belief - negative                                                | General                                                 |
| 86949        | Benedict et al. (2012)(34)           | Female 23.6%<br>Age NR<br>FT donor NR            | Africa        | Quantitative | Background              | Whole blood; donor, non-donor     | Study specific                                      | Belief - negative                                                | 3, 6, 10                                                |
| 7280         | Bertoni et al. (2011)(35)            | Female 23.0%<br>Age NR<br>FT donor NR            | South America | Quantitative | Background              | Whole blood; not specified        | Kelley et al. (1989)                                | Belief - negative                                                | 6                                                       |
| 7766         | Beyene (2020)(36)                    | Female 49.5%<br>M Age 31.9 yrs<br>FT donor 11.5% | Africa        | Quantitative | Background              | Whole blood; donor, non-donor     | Study specific                                      | Belief - positive<br>Belief - negative                           | 7, 8<br>4, 6, 8, 11, 14                                 |

continued on next page

Table S1 - Details of included studies (N=247) - follows from previous page

| Data file ID | Study                          | Participants                                    | Continent     | Study Design        | Health perception focus | Donation status               | Health perceptions measure                                       | Perception type & valence                   | Results category <sup>a</sup>  |
|--------------|--------------------------------|-------------------------------------------------|---------------|---------------------|-------------------------|-------------------------------|------------------------------------------------------------------|---------------------------------------------|--------------------------------|
| 7748         | Bhalwar et al. (2003)(37)      | Female 48.2%<br>Age NR<br>FT donor NR           | Asia          | Quantitative        | Background              | Whole blood; not specified    | Study specific                                                   | Belief - negative                           | 6                              |
| 7687         | Bhattacharya et al. (2000)(38) | Female 44.9%<br>M Age 15.8 yrs<br>FT donor NR   | North America | Quantitative        | Background              | Whole blood; not specified    | Study specific                                                   | Belief - negative                           | 6                              |
| 7212         | Bilal et al. (2016)(39)        | Female 100.0%<br>M Age 26.7 yrs<br>FT donor NR  | Asia          | Quantitative        | Background              | Whole blood; non-donor        | Study specific                                                   | Belief - negative                           | General, 1, 3, 6, 8, 11, 12    |
| 5914         | Bourne et al. (2013)(40)       | Female 45.0%<br><40 yrs 78.5%<br>FT donor 10%   | North America | Quantitative        | Background              | Whole blood; donor, non-donor | Study specific                                                   | Belief - negative<br>Belief - uncategorised | General, 4, 6<br>8             |
| 6280         | Bove et al. (2011)(41)         | Female NR<br>M Age 49.0 yrs<br>FT donor NR      | Oceania       | Qualitative         | Background              | Plasma; donor                 | Focus groups                                                     | Experience - negative                       | General, 2, 3, 11              |
| 5659         | Bravo et al. (2011)(42)        | Female 60.1%<br><40 yrs 22.2%<br>FT donor 23.6% | North America | Quantitative        | Central                 | Whole blood; donor            | Donor report                                                     | Experience - negative                       | 11                             |
| 5449         | Bucunienne et al. (2006)(43)   | Female 40.1%<br><40 yrs 41.0%<br>FT donor 14.0% | Europe        | Quantitative        | Background              | Whole blood; donor            | Study specific                                                   | Belief - positive<br>Belief - negative      | General<br>General             |
| 15061        | Cable et al. (2019)(44)        | Female 46.8%<br>M Age 44.0 yrs<br>FT donor 9.4% | North America | Quantitative        | Background              | Mixed; donor                  | Study specific                                                   | Belief - negative                           | 4                              |
| 14560        | Casebeer (2002)(45)            | Female 60.7%<br>Age NR<br>FT donor NR           | North America | Quantitative        | Background              | Whole blood; donor, non-donor | Study specific                                                   | Belief - negative                           | 6, 7                           |
| 13719        | Charbonneau et al. (2013)(46)  | Female 45.3%<br><40 yrs NR<br>FT donor NR       | North America | Qualitative         | Background              | Whole blood; donor, non-donor | Interviews                                                       | Belief - positive                           | General, 2, 3, 7, 9            |
| 13729        | Charbonneau et al. (2015)(47)  | Female 54.0%<br><40 yrs 45.5%<br>FT donor NR    | North America | Quantitative        | Background              | Mixed; repeat donor           | Study specific                                                   | Belief - positive                           | 3                              |
| 13723        | Charbonneau et al. (2018)(48)  | Female 50.0%<br><40 yrs 40.0%<br>FT donor NR    | North America | Mixed: Quantitative | Background              | Mixed; Donor                  | Charbonneau et al. (2015) & Interviews                           | Belief - positive                           | 3                              |
| 13074        | Checkley et al. (2019)(49)     | Female 49.4%<br>Age NR<br>FT donor NR           | Africa        | Mixed: Qualitative  | Background              | Whole blood; not specified    | Interviews                                                       | Belief - negative                           | 2                              |
| 13337        | Chen et al. (2015)(50)         | Female 44.6%<br><40 yrs 57.8%<br>FT donor NR    | Asia          | Mixed: Qualitative  | Background              | Whole blood; donor, non-donor | Interviews                                                       | Belief - negative                           | General, 2, 3, 4, 6, 8, 10, 12 |
| 12460        | Chequer et al. (1997)(51)      | Female 63.0%<br><40 yrs 58.0%<br>FT donor NR    | South America | Quantitative        | Background              | Whole blood; not specified    | World Health Organization (1990) Global Program on AIDS protocol | Belief - negative                           | 6                              |
| 11964        | Chopra et al. (2015)(52)       | Female 42.5%<br>M Age 21.3 yrs<br>FT donor NR   | Asia          | Quantitative        | Background              | Whole blood; donor, non-donor | Study specific                                                   | Belief - negative                           | General, 6                     |
| 11659        | Chuang et al. (1996)(53)       | Female 37.1%<br>M Age 39.5 yrs<br>FT donor NR   | North America | Quantitative        | Background              | Whole blood; not specified    | Kelly et al. (1992); King et al. (1987)                          | Belief - negative                           | 6                              |

continued on next page

Table S1 - Details of included studies (N=247) - follows from previous page

| Data file ID | Study                       | Participants                                     | Continent     | Study Design | Health perception focus | Donation status               | Health perceptions measure | Perception type & valence              | Results category*  |
|--------------|-----------------------------|--------------------------------------------------|---------------|--------------|-------------------------|-------------------------------|----------------------------|----------------------------------------|--------------------|
| 12111        | Cicolini et al. (2019)(64)  | Female 79.9%<br>M Age 24.7 yrs<br>FT donor 21.1% | Europe        | Quantitative | Background              | Whole blood; non-donor        | Study specific             | Belief - negative                      | 6, 11              |
| 12097        | Ciepiela et al. (2017)(55)  | Female NR<br>Age NR<br>FT donor NR               | Europe        | Quantitative | Background              | Whole blood; non-donor        | Study specific             | Belief - negative                      | 3, 6, 7, 11        |
| 11500        | Conceição et al. (2016)(56) | Female NR<br>Age NR<br>FT donor NR               | South America | Qualitative  | Background              | Whole blood; donor            | Interviews                 | Experience - positive                  | 9                  |
| 10374        | Covin et al. (2004)(57)     | Female 100.0%<br>M Age 20.0 yrs<br>FT donor NR   | North America | Qualitative  | Central                 | Whole blood; donor            | Donor report               | Experience - negative                  | 12                 |
| 18670        | Damulak et al. (2016)(58)   | Female 68.3%<br>M Age 23.7 yrs<br>FT donor NR    | Africa        | Quantitative | Background              | Whole blood; donor, non-donor | Study specific             | Belief - negative                      | 2, 5, 6, 11        |
| 86946        | Darega et al. (2015)(59)    | Female 33.2%<br>M Age 21.3 yrs<br>FT donor 77.7% | Africa        | Quantitative | Background              | Whole blood; donor, non-donor | Study specific             | Belief - negative                      | 1, 12              |
| 18219        | Dawadi et al. (2020)(60)    | Female 44.0%<br><40 yrs NR<br>FT donor 58.5%     | Asia          | Quantitative | Background              | Whole blood; donor, non-donor | Study specific             | Belief - negative                      | General            |
| 18454        | Dean et al. (2018)(61)      | Female 59.6%<br>M Age 24.0 yrs<br>FT donor NR    | North America | Quantitative | Background              | Whole blood; donor, non-donor | Study specific             | Belief - negative                      | 6                  |
| 17174        | Denman et al. (1995)(62)    | Female 52.5%<br><40 yrs 100%<br>FT donor NR      | Europe        | Quantitative | Background              | Whole blood; not specified    | Study specific             | Belief - negative                      | 6                  |
| 17175        | Denman et al. (1996)(63)    | Female 53.0%<br><40 yrs 100%<br>FT donor NR      | Europe        | Quantitative | Background              | Whole blood; not specified    | Study specific             | Belief - negative                      | 6                  |
| 16431        | Dilsad et al. (2014)(64)    | Female 100.0%<br><40 yrs 68.4%<br>FT donor NR    | Asia          | Qualitative  | Background              | Whole blood; non-donor        | Interviews                 | Belief - negative<br>Belief - positive | General, 4, 6<br>9 |
| 16176        | Doshi et al. (2018)(65)     | Female 81.8%<br>Age NR<br>FT donor NR            | Asia          | Quantitative | Background              | Whole blood; not specified    | Study specific             | Belief - negative                      | 6, 11              |
| 15318        | Dubey et al. (2014a)(66)    | Female 26.7%<br><40 yrs 80.3%<br>FT donor NR     | Asia          | Quantitative | Background              | Whole blood; donor, non-donor | Study specific             | Belief - negative                      | General, 4, 6, 14  |
| 15321        | Dubey et al. (2014b)(67)    | Female 23.0%<br><40 yrs 100.0%<br>FT donor NR    | Asia          | Quantitative | Background              | Whole blood; donor, non-donor | Study specific             | Belief - negative                      | 6                  |
| 22777        | Ehimen et al. (2016)(68)    | Female 58.1%<br><40 yrs 94.0%<br>FT donor NR     | Africa        | Quantitative | Other: Background       | Whole blood; donor, non-donor | Study specific             | Belief - negative                      | 6                  |
| 86945        | Elias et al. (2016)(69)     | Female 28.0%<br>M Age 24.0 yrs<br>FT donor 45.2% | Africa        | Quantitative | Background              | Whole blood; donor, non-donor | Study specific             | Experience - negative                  | 2, 11              |
| 22870        | Elliot et al. (1999)(70)    | Female 86.8%<br>M Age 26.9 yrs<br>FT donor NR    | Oceania       | Quantitative | Background              | Whole blood; not specified    | Study specific             | Belief - negative                      | 6                  |

continued on next page

Table S1 - Details of included studies (N=247) - follows from previous page

| Data file ID  | Study                               | Participants                                     | Continent     | Study Design | Health perception focus | Donation status               | Health perceptions measure | Perception type & valence                  | Results category*               |
|---------------|-------------------------------------|--------------------------------------------------|---------------|--------------|-------------------------|-------------------------------|----------------------------|--------------------------------------------|---------------------------------|
| 22255         | El-Qaderi (2004)(71)                | Female 53.2%<br>Age NR<br>FT donor NR            | Asia          | Quantitative | Background              | Whole blood; not specified    | Study specific             | Belief - negative                          | 6                               |
| 22029         | Erwin et al. (2009)(72)             | Female NR<br>Age NR<br>FT donor NR               | Asia          | Qualitative  | Background              | Whole blood; not specified    | Interviews                 | Belief - negative<br>Experience - negative | General, 1, 3, 6,<br>11<br>2, 4 |
| 21990         | Eshak et al. (2019)(73)             | Female 57.0%<br>M Age 21.9 yrs<br>FT donor 57.4% | Asia          | Quantitative | Background              | Whole blood; donor, non-donor | Study specific             | Belief - negative                          | 4, 6, 7                         |
| 20717         | Ferdousi et al. (2015)(74)          | Female NR<br>Age NR<br>FT donor NR               | Oceania       | Qualitative  | Background              | Whole blood; not specified    | Focus groups               | Belief - positive<br>Belief - negative     | 7, 9<br>3, 6, 10, 11, 12,<br>14 |
| 20660         | Ferguson et al. (2019)(75)          | Female 61.0%<br>M Age 27.5 yrs<br>FT donor 25.6% | Europe        | Quantitative | Background              | Whole blood; donor            | Study specific             | Belief - positive                          | General, 7                      |
| 21221         | Fernandez-Montoya et al. (1998)(76) | Female 65.9%<br>M Age 42.2 yrs<br>FT donor NR    | Europe        | Quantitative | Background              | Whole blood; donor            | Study specific             | Belief - positive<br>Belief - negative     | General<br>General, 3, 6        |
| 21110         | Ferreira et al. (2014)(77)          | Female 28.0%<br><40 yrs 39.6%<br>FT donor NR     | South America | Quantitative | Background              | Whole blood; donor            | Study specific             | Belief - positive                          | 9                               |
| 19684         | Frye et al. (2014)(78)              | Female NR<br>Age NR<br>FT donor NR               | North America | Qualitative  | Background              | Whole blood; not specified    | Focus groups               | Belief - negative                          | 11                              |
| 26922         | Gader et al. (2011)(79)             | Female 0.0%<br><40 yrs 64.0%<br>FT donor NR      | Asia          | Quantitative | Background              | Whole blood; non-donor        | Study specific             | Belief - negative                          | General                         |
| 27137         | Gammon et al. (2018)(80)            | Female 41.5%<br>Age NR<br>FT donor 4.6%          | North America | Quantitative | Background              | Mixed; donor                  | Study specific             | Experience - negative                      | 10                              |
| 27100         | Gani (2017)(81)                     | Female 41.1%<br>Age NR<br>FT donor 52.3%         | Asia          | Quantitative | Background              | Whole blood; donor, non-donor | Study specific             | Belief - negative                          | General, 3, 6                   |
| 27028         | Gao et al. (2017)(82)               | Female 69.9%<br><40 yrs 92.8%<br>FT donor NR     | Asia          | Quantitative | Background              | Whole blood; donor, non-donor | Study specific             | Belief - positive<br>Belief - negative     | General<br>General, 6           |
| 26380         | Getta et al. (2018)(83)             | Female 0.0%<br>M Age 33.9 yrs<br>FT donor 50.0%  | Asia          | Quantitative | Background              | Whole blood; donor            | Study specific             | Belief - positive                          | 7, 13                           |
| 25486         | Gilani et al. (2007)(84)            | Female NR<br><40 yrs 69.3%<br>FT donor NR        | Asia          | Quantitative | Background              | Whole blood; non-donor        | Study specific             | Belief - negative                          | 3                               |
| 25095 & 25111 | Glynn et al. (2001 & 2002)(85, 86)  | Female NR<br>Age NR<br>FT donor NR               | North America | Quantitative | Background              | Mixed; donor                  | REDS 1998 survey           | Belief - positive                          | General                         |
| 25100         | Glynn et al. (2006)(87)             | Female 51.9%<br>M Age 37.8 yrs<br>FT donor 32.7% | North America | Quantitative | Background              | Whole blood; donor            | REDS 2003 survey           | Belief - positive                          | General                         |

continued on next page

Table S1 - Details of included studies (N=247) - follows from previous page

| Data file ID | Study                              | Participants                                      | Continent     | Study Design        | Health perception focus | Donation status               | Health perceptions measure                                             | Perception type & valence                                       | Results category*                   |
|--------------|------------------------------------|---------------------------------------------------|---------------|---------------------|-------------------------|-------------------------------|------------------------------------------------------------------------|-----------------------------------------------------------------|-------------------------------------|
| 25019        | Goldman et al. (2014)(88)          | Female 57.0%<br>Age NR<br>FT donor 19.0%          | North America | Quantitative        | Background              | Whole blood; donor            | Interviews                                                             | Belief – positive<br>Belief – negative                          | General<br>General                  |
| 25567        | Goldman et al. (2013b)(89)         | Female 50.3%<br>Age NR<br>FT donor 35.6%          | North America | Quantitative        | Central                 | Whole blood; donor            | Goldman et al. (2001)                                                  | Experience – negative                                           | 3, 10, 11, 12                       |
| 24905        | Gomez et al. S2 (2013)(90)         | Female 56.1%<br>Age NR<br>FT donor NR             | North America | Quantitative        | Background              | Whole blood; not specified    | Study specific                                                         | Belief – negative                                               | 6                                   |
| 24836        | Gonzalez et al. (2008)(91)         | Female 48.0%<br>M Age 30.0 yrs<br>FT donor 43.0%  | South America | Quantitative        | Background              | Whole blood; donor            | REDS 1998 survey                                                       | Belief – positive                                               | 9                                   |
| 86940        | Grossman et al. (2005)(92)         | Female 100.0%<br><40 yrs 100.0%<br>FT donor 31.0% | North America | Mixed; qualitative  | Background              | Whole blood; donor, non-donor | Study specific                                                         | Belief – negative                                               | 6                                   |
| 9453 & 23843 | Gupta et al. (2020 & 2021)(28, 29) | Female 2.9%<br><40 yrs 39.3%<br>FT donor 31.7%    | Asia          | Quantitative        | Central                 | Mixed; donor                  | Interviews                                                             | Experience – negative                                           | 3, 11, 12                           |
| 31138        | Hancock et al. (1999)(93)          | Female 57.5%<br>M Age 16.3 yrs<br>FT donor NR     | North America | Quantitative        | Background              | Whole blood; not specified    | San Diego County Office's High School HIV/Abstinence education program | Belief – negative                                               | 6                                   |
| 86936        | Harrington (2012)(94)              | Female NR<br>Age NR<br>FT donor NR                | Africa        | Mixed; quantitative | Background              | Whole blood; donor, non-donor | Study specific                                                         | Belief – negative                                               | General, 3, 4, 6, 8, 14             |
| 30831        | Harrington et al. (2007)(95)       | Female 57.6%<br><40 yrs 16.3%<br>FT donor NR      | Europe        | Quantitative        | Background              | Whole blood; non-donor        | Study specific                                                         | Belief – negative                                               | 6, 10, 11                           |
| 28509        | Hong et al. (2011)(96)             | Female 60.0%<br>M Age 20.6 yrs<br>FT donor 24.0%  | Asia          | Quantitative        | Background              | Whole blood; donor, non-donor | Study specific                                                         | Belief – positive<br>Belief – negative<br>Experience – negative | General<br>General, 11<br>3, 11, 12 |
| 28163        | Hosain et al. (1997)(97)           | Female 16.8%<br>M Age 22.0 yrs<br>FT donor NR     | Asia          | Quantitative        | Background              | Whole blood; donor, non-donor | Study specific                                                         | Belief – negative                                               | General, 3, 4, 6, 7, 11             |
| 33743        | Imperato (1996)(98)                | Female 44.4%<br>Age NR<br>FT donor NR             | North America | Quantitative        | Background              | Whole blood; not specified    | Study specific                                                         | Belief – negative                                               | 6                                   |
| 34097        | Inaba et al. (2013)(99)            | Female 26.8%<br>M Age 41.2 yrs<br>FT donor 6.6%   | Asia          | Quantitative        | Central                 | Whole blood; donor            | Study specific                                                         | Belief – negative<br>Experience – negative                      | 10<br>11                            |
| 33223        | Jaafar et al. (2017)(100)          | Female 50.0%<br>M Age 23.0 yrs<br>FT donor NR     | Asia          | Qualitative         | Background              | Whole blood; donor            | Interviews                                                             | Belief – negative<br>Experience – positive                      | 10<br>9                             |
| 33194        | Jacobs et al. (1995)(101)          | Female 22.9%<br>Age NR<br>FT donor NR             | Africa        | Quantitative        | Background              | Whole blood; donor, non-donor | Study specific                                                         | Belief – positive<br>Belief – negative                          | General<br>General, 6               |
| 32861        | James et al. (2013)(102)           | Female 69.7%<br><40 years 30.0%<br>FT donor 13.0% | North America | Quantitative        | Background              | Whole blood; donor, non-donor | Study specific                                                         | Belief – negative                                               | 6, 11                               |

continued on next page

Table S1 - Details of included studies (N=247) - follows from previous page

| Data file ID | Study                                    | Participants                                      | Continent     | Study Design | Health perception focus | Donation status               | Health perceptions measure | Perception type & valence                                       | Results category <sup>a</sup>       |
|--------------|------------------------------------------|---------------------------------------------------|---------------|--------------|-------------------------|-------------------------------|----------------------------|-----------------------------------------------------------------|-------------------------------------|
| 32689        | Japar et al. (2018)(103)                 | Female 72.4%<br>M Age 21.7 yrs<br>FT donor NR     | Asia          | Quantitative | Background              | Whole blood; donor, non-donor | Study specific             | Belief - negative<br>Belief - uncategorised                     | General, 4<br>8                     |
| 32999        | Javazadeh Shahshahani (2007)(104)        | Female 100.0%<br>M Age 35.0 yrs<br>FT donor NR    | Asia          | Quantitative | Background              | Whole blood; donor, non-donor | Study specific             | Belief - negative                                               | 1, 6                                |
| 32994        | Javazadeh Shahshahani et al. (2006)(105) | Female 50.0%<br><40 yrs 50.0%<br>FT donor NR      | Asia          | Quantitative | Background              | Whole blood; donor, non-donor | Study specific             | Belief - positive<br>Belief - negative                          | General, 7, 9<br>General            |
| 32993        | Javaeed et al. (2020)(106)               | Female 69.5%<br>M Age 21.2 yrs<br>FT donor NR     | Asia          | Quantitative | Background              | Whole blood; not specified    | Study specific             | Belief - positive<br>Belief - negative                          | General<br>General<br>General, 4, 6 |
| 32616        | Jemberu et al. (2016)(107)               | Female 55.2%<br><40 yrs 68.2%<br>FT donor 63.7%   | Africa        | Quantitative | Background              | Whole blood; donor, non-donor | Study specific             | Belief - positive<br>Belief - negative                          | General, 7<br>4, 6, 11, 14          |
| 31768        | Joshi et al. (2017)(108)                 | Female 41.7%<br>M Age 39.1 yrs<br>FT donor NR     | Europe        | Qualitative  | Background              | Whole blood; non-donor        | Interviews                 | Belief - positive<br>Belief - negative                          | 9<br>5                              |
| 86933        | Kabinda et al. (2014)(109)               | Female 38.5%<br>M Age 29.0 yrs<br>FT donor 27.3%  | Africa        | Quantitative | Background              | Whole blood; non-donor        | Study specific             | Belief - negative                                               | 6, 10                               |
| 39023        | Kamel et al. (2010)(110)                 | Female 48.0%<br><40 yrs 22.0%<br>FT donor 21.0%   | North America | Quantitative | Background              | Mixed; donor                  | Donor report               | Experience - negative                                           | 10, 11, 12                          |
| 38549        | Kar et al. (2004)(111)                   | Female 25.5%<br>Age NR<br>FT donor 70.6%          | Asia          | Quantitative | Background              | Whole blood; donor            | Study specific             | Experience - negative                                           | 2, 3                                |
| 38528        | Karacan et al. (2013)(112)               | Female 0.0%<br>M Age 33.0 yrs<br>FT donor 11.6%   | Asia          | Quantitative | Background              | Whole blood; donor            | Study specific             | Belief - positive                                               | General                             |
| 38525        | Karacaoglu et al. (2020)(113)            | Female 45.5%<br>M Age 19.9 yrs<br>FT donor NR     | Asia          | Quantitative | Background              | Whole blood; not specified    | Study specific             | Belief - negative                                               | 3, 6, 11                            |
| 38638        | Kasraian (2010)(114)                     | Female 19.6%<br>M Age 32.6 yrs<br>FT donor 45.1%  | Asia          | Quantitative | Background              | Whole blood; lapsed donor     | Study specific             | Belief - positive<br>Belief - negative<br>Experience - negative | General<br>6<br>10                  |
| 38620        | Kasraian et al. (2012)(115)              | Female 5.5%<br>M Age 37.8 yrs<br>FT donor 14.3%   | Asia          | Quantitative | Background              | Whole blood; donor            | Study specific             | Belief - positive                                               | General                             |
| 38628        | Kasraian et al. (2020a)(116)             | Female 4.0%<br><40 yrs 40.0%<br>FT donor 33.3%    | Asia          | Quantitative | Background              | Whole blood; donor            | Maghaidi et al. (2011)     | Belief - positive                                               | General                             |
| 38630        | Kasraian et al. (2020b)(117)             | Female 100.0%<br>M Age 35.8 yrs<br>FT donor 93.3% | Asia          | Quantitative | Background              | Whole blood; donor, non-donor | Study specific             | Belief - positive<br>Belief - negative<br>Experience - negative | General<br>3, 4, 6, 11, 12<br>3, 4  |
| 38301        | Kayani et al. (2019)(118)                | Female 37.4%<br><40 yrs 95.3%<br>FT donor NR      | Asia          | Quantitative | Central                 | Whole blood; donor, non-donor | Study specific             | Belief - positive<br>Belief - negative                          | 7, 8, 9<br>General, 7, 12           |

continued on next page

Table S1 - Details of included studies (N=247) - follows from previous page

| Data file ID | Study                             | Participants                                     | Continent     | Study Design        | Health perception focus | Donation status               | Health perceptions measure | Perception type & valence                                       | Results category*                    |
|--------------|-----------------------------------|--------------------------------------------------|---------------|---------------------|-------------------------|-------------------------------|----------------------------|-----------------------------------------------------------------|--------------------------------------|
| 38227        | Kebede et al. (2019)(119)         | Female 35.0%<br><40 yrs 76.6%<br>FT donor NR     | Africa        | Quantitative        | Background              | Whole blood; donor, non-donor | NBBSE (2016)               | Belief - negative                                               | 3, 5, 6, 11, 13                      |
| 37191        | Khan et al. (2018)(120)           | Female 72.9%<br><40 yrs 100.0%<br>FT donor NR    | Asia          | Quantitative        | Background              | Whole blood; not specified    | Study specific             | Belief - negative                                               | 6                                    |
| 36339        | Klinkenberg et al. (2018)(121)    | Female 73.8%<br>M Age 43.0 yrs<br>FT donor NR    | Europe        | Quantitative        | Background              | Whole blood; lapsed donor     | Study specific             | Experience - negative                                           | 10                                   |
| 35178        | Kowsalya et al. (2013)(122)       | Female NR<br>Age NR<br>FT donor NR               | Asia          | Quantitative        | Background              | Whole blood; donor, non-donor | Study specific             | Belief - positive<br>Belief - negative                          | General<br>4                         |
| 34442        | Kristy (1998)(123)                | Female NR<br>Age NR<br>FT donor NR               | Oceania       | Mixed; NS           | Central                 | Whole blood; not specified    | Interviews                 | Belief - negative                                               | 2, 3, 5, 11                          |
| 34561        | Kuruvatti et al. (2011)(124)      | Female 52.2%<br>Age NR<br>FT donor NR            | Europe        | Quantitative        | Background              | Whole blood; donor, non-donor | Study specific             | Belief - negative                                               | 6, 10                                |
| 43242        | Leigh et al. (2007)(125)          | Female 45.0%<br>Age NR<br>FT donor NR            | Europe        | Mixed; Quantitative | Background              | Whole blood; donor, non-donor | Study specific             | Belief - negative                                               | 6                                    |
| 40934        | Lindley et al. (2010)(126)        | Female 61.0%<br>M Age 50.9 yrs<br>FT donor NR    | North America | Quantitative        | Background              | Whole blood; not specified    | Study specific             | Belief - negative                                               | 6                                    |
| 39701        | Lynch et al. (2018)(127)          | Female 46.7%<br><40 yrs 20.0%<br>FT donor NR     | Europe        | Qualitative         | Background              | Whole blood; donor            | Study specific             | Belief - positive<br>Belief - negative<br>Experience - negative | General, 3, 8, 9<br>General, 5<br>11 |
| 54617        | Maghsudlu et al. (2011)(128)      | Female 14.9%<br>M Age 35.2 yrs<br>FT donor 24.1% | Asia          | Quantitative        | Background              | Whole blood; donor            | Study specific             | Belief - positive                                               | General, 8, 9                        |
| 54783        | Mahon-Daly (2012)(129)            | Female 57.5%<br>Age NR<br>FT donor NR            | Europe        | Qualitative         | Background              | Whole blood; donor            | Study specific             | Belief - positive<br>Experience - positive                      | 9<br>General                         |
| 54359        | Malako et al. (2019)(130)         | Female 40.8%<br><40 yrs 96.8%<br>FT donor NR     | Africa        | Quantitative        | Background              | Whole blood; donor, non-donor | Study specific             | Belief - negative                                               | General, 3, 6, 10                    |
| 54312        | Malik et al. (2010)(131)          | Female 15.0%<br>M Age 35.0 yrs<br>FT donor 93.0% | Asia          | Quantitative        | Background              | Whole blood; donor, non-donor | Study specific             | Belief - positive<br>Belief - negative                          | General<br>6                         |
| 53751        | Marantidou et al. (2007)(132)     | Female 50.5%<br><40 yrs 69.3%<br>FT donor NR     | Europe        | Quantitative        | Background              | Whole blood; donor, non-donor | Study specific             | Belief - negative                                               | 4, 6, 11                             |
| 53394        | Martin-Santana et al. (2020)(133) | Female 74.3%<br><40 yrs 68.3%<br>FT donor NR     | Europe        | Quantitative        | Background              | Whole blood; non-donor        | Study specific             | Belief - positive<br>Belief - negative                          | General<br>12                        |
| 53203        | Masser et al. (2013)(134)         | Female 63.2%<br>Age NR<br>FT donor NR            | Oceania       | Mixed; Quantitative | Background              | Whole blood; donor            | BDRI                       | Belief - positive<br>Belief - negative<br>Experience - negative | General<br>6, 11<br>3, 10, 11        |

continued on next page



Table S1 - Details of included studies (N=247) - follows from previous page

| Data file ID | Study                          | Participants                                     | Continent     | Study Design       | Health perception focus | Donation status                      | Health perceptions measure    | Perception type & valence              | Results category <sup>a</sup> |
|--------------|--------------------------------|--------------------------------------------------|---------------|--------------------|-------------------------|--------------------------------------|-------------------------------|----------------------------------------|-------------------------------|
| 52228        | Masser et al. (2016)(135)      | Female 50.0%<br>M Age 40.4 yrs<br>FT donor NR    | Oceania       | Quantitative       | Background              | Mixed; donor                         | Study specific                | Experience - negative                  | 10                            |
| 52991        | Mathew et al. (2007)(136)      | Female 53.0%<br><40 yrs 47.0%<br>FT donor NR     | North America | Qualitative        | Background              | Whole blood; lapsed donor, non-donor | Study specific                | Belief - negative                      | 6                             |
| 52104        | McVittie et al. S1 (2006)(137) | Female NR<br>Age NR<br>FT donor NR               | Europe        | Mixed: Qualitative | Background              | Whole blood; donor, non-donor        | Study specific                | Belief - negative                      | 6                             |
| 86929        | Meinia et al. (2016)(138)      | Female NR<br>Age NR<br>FT donor NR               | Asia          | Quantitative       | Background              | Whole blood; donor, non-donor        | Study specific                | Belief - positive<br>Belief - negative | General<br>2, 4, 8            |
| 51913        | Meiku et al. (2018)(139)       | Female 82.7%<br><40 yrs 100.0%<br>FT donor NR    | Africa        | Quantitative       | Background              | Whole blood; donor                   | Study specific                | Experience - negative                  | 3                             |
| 50838        | Mirza et al. (2015)(140)       | Female NR<br>Age NR<br>FT donor NR               | Asia          | Quantitative       | Background              | Whole blood; donor, non-donor        | Study specific                | Belief - negative                      | 6                             |
| 86928        | Misganaw et al. (2014)(141)    | Female 46.4%<br>M Age 21.0 yrs<br>FT donor NR    | Africa        | Quantitative       | Background              | Whole blood; donor, non-donor        | Study specific                | Belief - negative                      | 2, 3, 4, 6                    |
| 51198        | Mishra et al. (2016)(142)      | Female 34.6%<br>M Age 19.8 yrs<br>FT donor NR    | Asia          | Quantitative       | Background              | Whole blood; donor, non-donor        | Study specific                | Belief - positive<br>Belief - negative | General, 4, 7, 8<br>3, 6      |
| 51187        | Misje et al. (2005)(143)       | Female 47.0%<br>Age NR<br>FT donor 8.0%          | Europe        | Quantitative       | Background              | Whole blood; donor                   | Volunteer Functions Inventory | Belief - positive                      | General                       |
| 86919        | Mohammed et al. (2016)(144)    | Female 67.4%<br>M Age 20.1 yrs<br>FT donor NR    | Asia          | Quantitative       | Background              | Whole blood; non-donor               | Study specific                | Belief - negative                      | 11                            |
| 50718        | Mohammed et al. (2018)(145)    | Female 26.9%<br>M Age 29.2 yrs<br>FT donor 54.9% | Africa        | Quantitative       | Background              | Whole blood; donor                   | Study specific                | Belief - negative                      | 3, 6, 11                      |
| 50549        | Montoya et al. (2001)(146)     | Female 58.4%<br><40 yrs 100.0%<br>FT donor NR    | North America | Quantitative       | Background              | Whole blood; not specified           | Study specific                | Belief - negative                      | 6                             |
| 50525        | Moog (2004)(147)               | Female NR<br>Age NR<br>FT donor NR               | Europe        | Quantitative       | Background              | Mixed; donor                         | Unknown                       | Experience - negative                  | 3                             |
| 50006        | Morand et al. (2016)(148)      | Female 49.6%<br>M Age 37.0 yrs<br>FT donor 14.9% | Europe        | Quantitative       | Background              | Whole blood; donor                   | Study specific                | Experience - negative                  | 3, 11                         |
| 49623        | Mousavi et al. (2011)(149)     | Female 41.5%<br><40 yrs 59.0%<br>FT donor NR     | Asia          | Quantitative       | Background              | Whole blood; donor, non-donor        | Study specific                | Belief - positive<br>Belief - negative | General<br>4, 6               |
| 86927        | Mulatu et al. (2017)(150)      | Female 48.4%<br><40 yrs 65.2%<br>FT donor NR     | Africa        | Quantitative       | Background              | Whole blood; not specified           | Study specific                | Belief - negative                      | 3, 6, 11                      |

continued on next page

Table S1 - Details of included studies (N=247) - follows from previous page

| Data file ID         | Study                                       | Participants                                   | Continent     | Study Design       | Health perception focus | Donation status               | Health perceptions measure | Perception type & valence                      | Results category*                   |
|----------------------|---------------------------------------------|------------------------------------------------|---------------|--------------------|-------------------------|-------------------------------|----------------------------|------------------------------------------------|-------------------------------------|
| 49340                | Mumtaz et al. (2012)(151)                   | Female NR<br>Age NR<br>FT donor NR             | Asia          | Qualitative        | Background              | Whole blood; not specified    | Focus groups/ interviews   | Belief - negative                              | General, 1                          |
| 48993                | Muthivi et al. (2015)(152)                  | Female 35.0%<br>Age NR<br>FT donor NR          | Africa        | Qualitative        | Background              | Whole blood; donor, non-donor | Focus Groups               | Belief - positive<br>Belief - negative         | General<br>General, 6, 11, 12       |
| 49183                | Mwaba et al. (1995)(153)                    | Female 50.0%<br>M Age 20.8 yrs<br>FT donor NR  | Africa        | Quantitative       | Background              | Whole blood; not specified    | Study specific             | Belief - negative                              | General, 3, 6                       |
| 56723                | Namba et al. (2021)(154)                    | Female 72.3%<br>M Age 35.5 yrs<br>FT donor NR  | Asia          | Quantitative       | Central                 | Whole blood; donor            | Donor report               | Experience - negative                          | 10, 11                              |
| 56631                | Narayanan et al. (2020)(155)                | Female NR<br>Age NR<br>FT donor NR             | Asia          | Quantitative       | Background              | Whole blood; donor            | Study specific             | Belief - positive<br>Experience - negative     | General<br>10                       |
| 56918                | Natukunda et al. (2015)(156)                | Female 36.0%<br>Age NR<br>FT donor NR          | Africa        | Mixed: Qualitative | Background              | Whole blood; not specified    | Focus Groups               | Belief - negative                              | General                             |
| 56882                | Navkudkar et al. (2021)(157)                | Female 13.0%<br>M Age 30.4 yrs<br>FT donor NR  | Asia          | Quantitative       | Background              | Whole blood; donor            | Interviews                 | Experience - negative                          | 10                                  |
| 56205                | Nepal (2015)(158)                           | Female 54.6%<br>M Age 23.0 yrs<br>FT donor NR  | Asia          | Quantitative       | Background              | Whole blood; not specified    | Study specific             | Belief - positive<br>Belief - negative         | General<br>General, 3, 6, 11        |
| 56029                | Newman (2001)(159)                          | Female 58.3%<br>Age NR<br>FT donor NR          | North America | Quantitative       | Central                 | Whole blood; donor            | Donor report               | Experience - negative                          | 12                                  |
| 56032                | Newman et al. (2001)(160)                   | Female NR<br>Age NR<br>FT donor NR             | North America | Quantitative       | Central                 | Whole blood; donor            | Donor report               | Experience - negative                          | 11                                  |
| 56000, 56004 & 56011 | Newman et al. (2003, 2005, & 2006)(161-163) | Female 55.3%<br>Age NR<br>FT donor 16.5%       | North America | Quantitative       | Central                 | Whole blood; donor            | Study specific             | Experience - negative                          | 3, 11, 12,                          |
| 56383                | Ngoma et al. (2013)(164)                    | Female 43.5%<br>M Age 20.3 yrs<br>FT donor NR  | Asia          | Quantitative       | Background              | Whole blood; donor, non-donor | Study specific             | Belief - negative                              | General, 10                         |
| 56363                | Nguyen et al. (2008)(165)                   | Female 50.0%<br><40 yrs 35.1%<br>FT donor 8.0% | North America | Quantitative       | Background              | Mixed; donor                  | REDS 1998 survey           | Belief - positive                              | General                             |
| 55654                | Nilsson et al. (2003)(166)                  | Female NR<br>Age NR<br>FT donor NR             | Europe        | Quantitative       | Central                 | Whole blood; donor            | Study specific             | Experience - positive<br>Experience - negative | General, 3<br>General, 3, 6, 11, 13 |
| 86921                | Nwabueze et al. (2014)(167)                 | Female 39.1%<br><40 yrs 94.9%<br>FT donor NR   | Africa        | Quantitative       | Background              | Whole blood; not specified    | Study specific             | Belief - negative                              | 2, 6, 13                            |
| 86920                | Nwogoh et al. (2013)(168)                   | Female 55.6%<br>M Age 32.0 yrs<br>FT donor NR  | Africa        | Quantitative       | Background              | Whole blood; not specified    | Study specific             | Belief - negative                              | General, 3, 6, 10                   |

continued on next page

Table S1 - Details of included studies (N=247) - follows from previous page

| Data file ID | Study                          | Participants                                    | Continent     | Study Design       | Health perception focus | Donation status               | Health perceptions measure | Perception type & valence              | Results category <sup>a</sup> |
|--------------|--------------------------------|-------------------------------------------------|---------------|--------------------|-------------------------|-------------------------------|----------------------------|----------------------------------------|-------------------------------|
| 62272        | Obi (2007)(169)                | Female 0.0%<br>M Age 26.2 yrs<br>FT donor NR    | Africa        | Quantitative       | Background              | Whole blood; not specified    | Study specific             | Belief - negative                      | 6                             |
| 62184        | O'Brien et al. (2013)(170)     | Female 52.7%<br><40 yrs 88.8%<br>FT donor 47.5% | Mixed         | Mixed              | Background              | Whole blood; donor            | Interviews/study specific  | Belief - positive<br>Belief - negative | General<br>General, 1, 6      |
| 62530        | Ogboghodo et al. (2015)(171)   | Female 36.4%<br>M Age 26.2 yrs<br>FT donor NR   | Africa        | Quantitative       | Background              | Whole blood; not specified    | Study specific             | Belief - negative                      | 11                            |
| 62069        | Öhrner et al. (2019)(172)      | Female 0.0%<br><40 yrs 100.0%<br>FT donor 32.0% | Europe        | Quantitative       | Background              | Whole blood; lapsed donor     | Study specific             | Experience - negative                  | 11                            |
| 62400        | Olaiya et al. (2004)(173)      | Female 1.1%<br>M Age 33.3 yrs<br>FT donor NR    | Africa        | Quantitative       | Background              | Whole blood; donor            | Study specific             | Belief - negative                      | 1, 2, 6, 7, 8, 12, 14         |
| 60955        | Otong et al. (1997)(174)       | Female NR<br>Age NR<br>FT donor NR              | Africa        | Mixed: Qualitative | Background              | Whole blood; not specified    | Focus Groups               | Belief - negative                      | General                       |
| 60864        | Ou-Yang et al. (2017a)(175)    | Female NR<br>Age NR<br>FT donor NR              | Asia          | Quantitative       | Background              | Whole blood; donor            | Study specific             | Belief - negative                      | 6                             |
| 60870        | Ou-Yang et al. (2017b)(176)    | Female 50.3%<br><40 yrs 87.1%<br>FT donor NR    | Asia          | Quantitative       | Background              | Whole blood; donor, non-donor | Study specific             | Belief - positive                      | General                       |
| 61314        | Padhaygumar et al. (2012)(177) | Female NR<br>M Age 15.0 yrs<br>FT donor NR      | Asia          | Quantitative       | Background              | Whole blood; not specified    | Study specific             | Belief - negative                      | 6                             |
| 60489        | Pandey et al. (2020)(178)      | Female 43.9%<br><40 yrs 8.1%<br>FT donor NR     | Asia          | Quantitative       | Background              | Whole blood; donor, non-donor | Study specific             | Belief - negative                      | 4, 6, 11                      |
| 60343        | Papagiannis et al. (2016)(179) | Female 77.5%<br>M Age 21.2 yrs<br>FT donor NR   | Europe        | Quantitative       | Background              | Whole blood; non-donor        | Study specific             | Belief - negative                      | General                       |
| 59750        | Pathuri et al. (2018)(180)     | Female NR<br>Age NR<br>FT donor NR              | Asia          | Quantitative       | Background              | Whole blood; donor, non-donor | Study specific             | Belief - negative                      | General                       |
| 59737        | Patil (2016)(181)              | Female NR<br>Age NR<br>FT donor NR              | Asia          | Quantitative       | Background              | Whole blood; donor, non-donor | Study specific             | Belief - negative                      | 2, 3, 4, 6                    |
| 58906        | Polonsky et al. (2011)(182)    | Female 51.1%<br>Age NR<br>FT donor NR           | Oceania       | Qualitative        | Background              | Whole blood; not specified    | Focus Groups               | Belief - negative                      | 3                             |
| 60067        | Raghuwanshi et al. (2016)(183) | Female 32.1%<br>M Age 20.0 yrs<br>FT donor NR   | Asia          | Quantitative       | Background              | Whole blood; donor, non-donor | Study specific             | Belief - positive<br>Belief - negative | General<br>6, 11              |
| 65146        | Randall (1996)(184)            | Female NR<br>Age NR<br>FT donor NR              | North America | Quantitative       | Background              | Whole blood; not specified    | Study specific             | Belief - negative                      | 6                             |
| 65029        | Ray et al. (2005)(185)         | Female 11.0%<br><40 yrs 94.0%<br>FT donor 18.0% | Asia          | Quantitative       | Background              | Whole blood; donor            | Study specific             | Belief - positive                      | 8                             |

continued on next page

Table S1 - Details of included studies (N=247) - follows from previous page

| Data file ID  | Study                                  | Participants                                                | Continent     | Study Design | Health perception focus | Donation status               | Health perceptions measure | Perception type & valence                  | Results category*           |
|---------------|----------------------------------------|-------------------------------------------------------------|---------------|--------------|-------------------------|-------------------------------|----------------------------|--------------------------------------------|-----------------------------|
| 64951 & 64952 | Renzaho et al. (2012 & 2013)(186, 187) | Female 43.8%<br>M Age 33.0 yrs<br>FT donor NR               | Oceania       | Quantitative | Background              | Whole blood; donor, non-donor | Study specific             | Belief - negative                          | 6                           |
| 64158         | Rodell et al. (1999)(188)              | Female 33.0%<br>M Age 32.9 yrs<br>FT donor NR               | North America | Quantitative | Background              | Plasma; donor                 | Study specific             | Belief - negative<br>Experience - negative | General<br>10               |
| 63939         | Rolseth et al. (2014)(189)             | Female 20.5%<br>M Age 37.0 yrs<br>FT donor NR               | Africa        | Qualitative  | Background              | Whole blood; donor, non-donor | Interviews                 | Belief - negative                          | General, 4                  |
| 63397         | Romero-Dominquez et al. (2019)(190)    | Female 51.1%<br>M Age 35.7%<br><40 yrs 35.7%<br>FT donor NR | Europe        | Quantitative | Background              | Whole blood; donor            | Study specific             | Belief - negative                          | 4, 11, 12                   |
| 63264         | Rose et al. S1 (2014)(191)             | Female 67.7%<br>Age NR<br>FT donor NR                       | North America | Quantitative | Central                 | Whole blood; not specified    | Study specific             | Belief - negative                          | 10                          |
| 79950         | Salaudeen et al. (2011a)(192)          | Female 45.1%<br>M Age 22.0 yrs<br>FT donor NR               | Africa        | Quantitative | Background              | Whole blood; donor, non-donor | Study specific             | Belief - negative                          | 1, 2, 3, 6, 7, 8, 11, 12    |
| 79952         | Salaudeen et al. (2011b)(193)          | Female 52.0%<br>M Age 28.0 yrs<br>FT donor NR               | Africa        | Quantitative | Background              | Whole blood; donor, non-donor | Study specific             | Belief - positive<br>Belief - negative     | 8<br>4, 6, 11, 14           |
| 73736         | Salvadori et al. (2019)(194)           | Female 29.2%<br>M Age 42.1 yrs<br>FT donor 1.6%             | Europe        | Quantitative | Central                 | Whole blood; donor            | Donor report               | Experience - negative                      | 11                          |
| 73672         | Sampath et al. (2007)(195)             | Female 56.2%<br><40 yrs 36.4%<br>FT donor NR                | South America | Quantitative | Background              | Whole blood; non-donor        | Study specific             | Belief - negative                          | 6, 11                       |
| 73641         | Sanabria (2009)(196)                   | Female NR<br>Age NR<br>FT donor NR                          | South America | Qualitative  | Central                 | Mixed; not-specified          | Interviews                 | Belief - positive<br>Experience - positive | 8, 9<br>9                   |
| 73534         | Sarma et al. (2016)(197)               | Female NR<br>Age NR<br>FT donor NR                          | Asia          | Quantitative | Background              | Whole blood; donor, non-donor | Study specific             | Belief - positive<br>Belief - negative     | General<br>General          |
| 73020         | Sataweddi (2011)(198)                  | Female 50.5%<br><40 yrs 84.0%<br>FT donor NR                | Asia          | Mixed        | Background              | Whole blood; donor, non-donor | Study specific             | Belief - positive<br>Belief - negative     | 7, 8<br>6, 8, 11            |
| 72795         | Schlumpf et al. (2008)(199)            | Female 53.5%<br><40 yrs 40.7%<br>FT donor NR                | North America | Quantitative | Background              | Whole blood; donor            | REDS 2003 survey           | Experience - negative                      | 10                          |
| 72495         | Schreiber et al. (2006)(200)           | Female 63.5%<br>Age NR<br>FT donor NR                       | North America | Quantitative | Background              | Whole blood; lapsed donor     | REDS 2003 survey           | Experience - negative                      | 10                          |
| 86913         | Seid et al. (2017)(201)                | Female 46.8%<br>M Age 30.6 yrs<br>FT donor NR               | Africa        | Quantitative | Background              | Whole blood; non-donor        | Study specific             | Belief - negative                          | 3                           |
| 71398         | Sekoni et al. (2014)(202)              | Female 65.8%<br>M Age 37.6 yrs<br>FT donor NR               | Africa        | Mixed        | Background              | Whole blood; donor, non-donor | Study specific             | Belief - positive<br>Belief - negative     | General<br>General, 3, 5, 6 |
| 70979         | Shah et al. (2007)(203)                | Female 5.8%<br>Age NR<br>FT donor NR                        | Asia          | Quantitative | Background              | Whole blood; donor            | Study specific             | Belief - negative                          | 6                           |

continued on next page

Table S1 - Details of included studies (N=247) - follows from previous page

| Data file ID  | Study                               | Participants                                     | Continent     | Study Design | Health perception focus | Donation status               | Health perceptions measure | Perception type & valence              | Results category <sup>a</sup> |
|---------------|-------------------------------------|--------------------------------------------------|---------------|--------------|-------------------------|-------------------------------|----------------------------|----------------------------------------|-------------------------------|
| 70688         | Sharma et al. (2001)(204)           | Female 52.3%<br><40 yrs 47.3%<br>FT donor 23.7%  | North America | Quantitative | Background              | Whole blood; donor            | Study specific             | Belief - negative                      | 6                             |
| 70710         | Sharma et al. (2012)(205)           | Female 64.5%<br>M Age 19.0 yrs<br>FT donor NR    | Asia          | Quantitative | Background              | Whole blood; non-donor        | Study specific             | Belief - negative                      | General, 6                    |
| 32871 & 70619 | Shaz et al. (2010 & 2011)(206, 207) | Female 72.0%<br>M Age 47.0 yrs<br>FT donor 24.0% | North America | Quantitative | Background              | Whole blood; donor, non-donor | Study specific             | Belief - positive<br>Belief - negative | General<br>6, 10              |
| 70507         | Shengra et al. (2009)(208)          | Female 25.0%<br>M Age 35.3 yrs<br>FT donor NR    | Asia          | Quantitative | Background              | Whole blood; not specified    | Study specific             | Belief - negative                      | General                       |
| 68618         | Sojka et al. (2008)(209)            | Female 39.4%<br>M Age 39.7 yrs<br>FT donor NR    | Europe        | Quantitative | Background              | Whole blood; donor            | Study specific             | Belief - positive<br>Belief - negative | General<br>11                 |
| 68172         | Sood et al. (2019)(210)             | Female 89.0%<br>Age NR<br>FT donor NR            | Asia          | Qualitative  | Background              | Whole blood; not specified    | Interviews                 | Belief - negative                      | General                       |
| 68793         | Sorensen et al. (2008)(211)         | Female NR<br>Age NR<br>FT donor NR               | Europe        | Quantitative | Central                 | Whole blood; donor            | Donor report               | Experience - negative                  | 11, 12                        |
| 68790         | Sorensen et al. (2015)(212)         | Female 58.0%<br>M Age 52.6 yrs<br>FT donor NR    | Europe        | Quantitative | Central                 | Whole blood; donor            | Study specific             | Experience - negative                  | General, 12                   |
| 68769         | Soriano (2019)(213)                 | Female 41.4%<br><40 yrs 44.9%<br>FT donor 36.2%  | Asia          | Quantitative | Background              | Whole blood; donor, non-donor | Study specific             | Belief - positive<br>Belief - negative | General<br>6, 11              |
| 68352         | Srirangaramasamy et al. (2017)(214) | Female 72.5%<br>Age NR<br>FT donor NR            | Asia          | Quantitative | Background              | Whole blood; donor, non-donor | Study specific             | Belief - negative                      | General, 4                    |
| 67590         | Steele et al. (2012)(215)           | Female 50.7%<br><40 yrs 37.3%<br>FT donor NR     | North America | Quantitative | Background              | Whole blood; donor, non-donor | Study specific             | Belief - negative                      | 6                             |
| 68808         | Suemnig et al. (2017)(216)          | Female 54.5%<br>M Age 25.0 yrs<br>FT donor 14.3% | Europe        | Quantitative | Background              | Whole blood; donor            | Study specific             | Experience - positive                  | General                       |
| 66661         | Sweegers et al. (2020)(217)         | Female 53.0%<br>M Age 48.0 yrs<br>FT donor NR    | Europe        | Quantitative | Central                 | Whole blood; donor            | Study specific             | Experience - negative                  | General, 3, 11, 13            |
| 86912         | Tadesse et al. (2018)(218)          | Female 33.0%<br>M Age 21.3 yrs<br>FT donor NR    | Africa        | Quantitative | Background              | Whole blood; donor, non-donor | Study specific             | Belief - negative                      | General, 3, 4                 |
| 77362         | Tagny et al. (2021)(219)            | Female 20.5%<br>M Age 28.3 yrs<br>FT donor NR    | Africa        | Quantitative | Background              | Whole blood; donor            | Study specific             | Belief - negative                      | 6, 11                         |
| 77334         | Tahir et al. (2017)(220)            | Female 41.7%<br>Age NR<br>FT donor NR            | Asia          | Quantitative | Background              | Whole blood; donor, non-donor | Study specific             | Belief - negative                      | General, 6, 7                 |
| 77254         | Takanashi et al. (2012)(221)        | Female NR<br>Age NR<br>FT donor NR               | Asia          | Quantitative | Central                 | Mixed; donor                  | Donor report               | Experience - negative                  | 11                            |

continued on next page

Table S1 - Details of included studies (N=247) - follows from previous page

| Data file ID | Study                                 | Participants                                    | Continent     | Study Design | Health perception focus | Donation status               | Health perceptions measure                          | Perception type & valence              | Results category*        |
|--------------|---------------------------------------|-------------------------------------------------|---------------|--------------|-------------------------|-------------------------------|-----------------------------------------------------|----------------------------------------|--------------------------|
| 76872        | Tariq et al. (2018)(222)              | Female 100.0%<br>Age NR<br>FT donor NR          | Asia          | Quantitative | Background              | Whole blood; donor, non-donor | Study specific                                      | Belief - negative                      | General, 3, 4, 6         |
| 76472        | Tey et al. (2020)(223)                | Female 33.0%<br><40 yrs 54.2%<br>FT donor 13.6% | Asia          | Qualitative  | Background              | Whole blood; donor            | Interviews                                          | Belief - positive                      | General, 9               |
| 76095        | Thaver et al. (2014)(224)             | Female 60.0%<br><40 yrs 100.0%<br>FT donor NR   | Asia          | Quantitative | Background              | Whole blood; not specified    | Study specific                                      | Belief - negative                      | 3, 6                     |
| 75907        | Thomson et al. (1999)(225)            | Female 52.6%<br>M Age 15.6 yrs<br>FT donor NR   | Europe        | Quantitative | Background              | Whole blood; not specified    | Study specific                                      | Belief - negative                      | 6                        |
| 75385        | Thorpe et al. (2020)(226)             | Female 41.0%<br><40 yrs 40.0%<br>FT donor NR    | Oceania       | Qualitative  | Background              | Plasma; donor                 | Interviews                                          | Experience - negative                  | General                  |
| 75380        | Thorpe et al. (2021)(227)             | Female 53.0%<br>M Age 36.2 yrs<br>FT donor NR   | Oceania       | Qualitative  | Background              | Mixed; donor                  | Interviews                                          | Experience - negative                  | General, 10              |
| 76371        | Tison et al. (2007)(228)              | Female 36.6%<br>Age NR<br>FT donor 65.5%        | Asia          | Quantitative | Background              | Whole blood; donor            | Study specific                                      | Belief - positive<br>Belief - negative | General<br>General, 1, 6 |
| 76336        | Tiwari et al. (2017)(229)             | Female 2.9%<br>M Age 32.6 yrs<br>FT donor 31.8% | Asia          | Quantitative | Central                 | Whole blood; donor            | Study specific                                      | Experience - negative                  | 3, 10, 11, 12            |
| 76169        | Tomasulo et al. (2010)(230)           | Female 59.0%<br>Age NR<br>FT donor NR           | North America | Quantitative | Central                 | Whole blood; donor            | Donor report                                        | Experience - negative                  | 11                       |
| 75591        | Trimmel et al. (2005)(231)            | Female 43.7%<br><40 yrs 55.0%<br>FT donor NR    | Europe        | Quantitative | Background              | Mixed; donor                  | Study specific                                      | Belief - positive                      | General                  |
| 80088        | Ugwu et al. (2019)(232)               | Female 43.0%<br><40 yrs 97.0%<br>FT donor NR    | Africa        | Quantitative | Background              | Whole blood; donor, non-donor | Study specific                                      | Belief - positive<br>Belief - negative | General<br>General       |
| 79991        | Uma et al. (2013)(233)                | Female 7.0%<br><40 yrs 90.3%<br>FT donor 46.1%  | Asia          | Quantitative | Background              | Whole blood; donor            | Study specific                                      | Belief - negative                      | 3                        |
| 79976        | Umeora et al. (2005)(234)             | Female 17.5%<br><40 yrs 81.9%<br>FT donor NR    | Africa        | Quantitative | Background              | Whole blood; not specified    | Study specific                                      | Belief - negative                      | General, 1, 11, 14       |
| 79233        | van den Hurk et al. (2017)(235)       | Female 52.2%<br>M Age 46.5 yrs<br>FT donor NR   | Europe        | Quantitative | Central                 | Whole blood; donor            | Study specific                                      | Belief - positive<br>Belief - negative | 3, 13<br>3, 11           |
| 79551        | van Dongen et al. (2012b)(236)        | Female NR<br>M Age 40.2 yrs<br>FT donor NR      | Europe        | Quantitative | Background              | Whole blood; lapsed donor     | Study specific                                      | Experience - negative                  | 10                       |
| 79468        | Veenus et al. (2017)(237)             | Female 38.2%<br><40 yrs 73.1%<br>FT donor NR    | Europe        | Quantitative | Background              | Whole blood; donor            | Study specific                                      | Experience - negative                  | 10                       |
| 77817        | Vossbeck-Eisebusch et al. (2011)(238) | Female 64.2%<br>M Age 23.6 yrs<br>FT donor NR   | Europe        | Quantitative | Central                 | Whole blood; donor            | Blut-infektions-Verletzungs-Fragebogen (BIVF), BDRi | Experience - negative                  | 11                       |

continued on next page

Table S1 - Details of included studies (N=247) - follows from previous page

| Data file ID  | Study                                           | Participants                                     | Continent     | Study Design | Health perception focus | Donation status               | Health perceptions measure                               | Perception type & valence                   | Results category <sup>a</sup> |
|---------------|-------------------------------------------------|--------------------------------------------------|---------------|--------------|-------------------------|-------------------------------|----------------------------------------------------------|---------------------------------------------|-------------------------------|
| 86908         | Waheed et al. (2015)(239)                       | Female 30.0%<br>M Age 21.8 yrs<br>FT donor NR    | Asia          | Quantitative | Background              | Whole blood; donor, non-donor | Study specific                                           | Belief - negative                           | 6, 11                         |
| 36294         | Weidmann et al. (2013)(240)                     | Female 60.2%<br><40 yrs 72.37%<br>FT donor 100%  | Europe        | Quantitative | Other: Background       | Whole blood; donor            | Study specific                                           | Belief - positive                           | General                       |
| 82456         | Weinberg et al. (2009)(241)                     | Female 32.6%<br>Age NR<br>FT donor NR            | Asia          | Quantitative | Background              | Whole blood; donor, non-donor | Study specific                                           | Belief - negative                           | 6                             |
| 82289 & 81459 | Wiersum-Osselton et al. (2019 & 2022)(242, 243) | Female 74.4%<br><40 yrs 100.0%<br>FT donor 42.5% | Europe        | Quantitative | Background              | Whole blood; donor            | Study specific                                           | Experience - negative                       | 11                            |
| 81071 & 81069 | Witwanitkit. (2000 & 2002)(244, 245)            | Female 70.0%<br><40yrs 87.0%<br>FT donor NR      | Asia          | Quantitative | Background              | Whole blood; donor, non-donor | Study specific                                           | Belief - negative                           | General                       |
| 86026         | Yaqoob et al. (2018)(246)                       | Female 32.8%<br><40 yrs 51.0%<br>FT donor NR     | Asia          | Quantitative | Background              | Whole blood; not specified    | Study specific                                           | Belief - negative                           | 1, 4                          |
| 86316         | Yeravdekar et al. (2019)(247)                   | Female 52.1%<br>M Age 28.9 yrs<br>FT donor NR    | Asia          | Quantitative | Background              | Whole blood; donor, non-donor | Study specific                                           | Belief - negative                           | 6                             |
| 86688 & 86689 | Yoshida et al. (2010, 2016)(248, 249)           | Female 37.5%<br>M Age 37.9 yrs<br>FT donor NR    | Asia          | Quantitative | Central                 | Whole blood; donor            | Study specific                                           | Experience - negative                       | 11                            |
| 85651         | Yu et al. (2019)(250)                           | Female NR<br>Age NR<br>FT donor NR               | Asia          | Qualitative  | Background              | Platelet; donor               | Interviews                                               | Belief - negative<br>Experience - negative  | 6<br>11                       |
| 85489         | Yuan et al. (2010)(251)                         | Female 40.5%<br>M Age 37.5 yrs<br>FT donor NR    | North America | Quantitative | Central                 | Mixed; donor                  | Donor report                                             | Experience - negative                       | 11                            |
| 85494         | Yuan et al. (2011)(252)                         | Female 69.4%<br><40 yrs 79.1%<br>FT donor NR     | North America | Quantitative | Background              | Whole blood; donor, non-donor | Study specific                                           | Belief - negative                           | General                       |
| 85731 & 85734 | Zaller et al. (2004 & 2005)(253, 254)           | Female 43.9%<br><40 yrs 80.5%<br>FT donor NR     | Asia          | Quantitative | Background              | Whole blood; donor, non-donor | Study specific                                           | Belief - negative                           | General, 6                    |
| 85091         | Zeiler et al. (2011)(255)                       | Female 25.8%<br><40 yrs 0.0%<br>FT donor NR      | Europe        | Quantitative | Central                 | Whole blood; donor            | Donor report                                             | Experience - negative                       | 10                            |
| 84192         | Zito et al. (2012)(256)                         | Female 52.3%<br>M Age 16.5 yrs<br>FT donor NR    | Europe        | Quantitative | Background              | Whole blood; not specified    | Study specific                                           | Belief - negative<br>Experience - negative  | 6<br>10                       |
| 83696 & 83691 | Zucoloto et al. (2018 & 2019)(257, 258)         | Female 79.7%<br>M Age 42.3 yrs<br>FT donor NR    | South America | Quantitative | Background              | Whole blood; donor, non-donor | Blood Donation Knowledge Questionnaire (BDKQ-<br>Brazil) | Belief - negative<br>Belief - uncategorised | 6<br>8                        |
| 84061         | Zucoloto et al. (2020)(259)                     | Female 33.3%<br><40 yrs 95.5%<br>FT donor NR     | South America | Quantitative | Background              | Whole blood; donor, non-donor | Study specific                                           | Belief - positive<br>Belief - negative      | 9<br>6, 10                    |

**SUPPLEMENTARY MATERIAL: INCLUDED STUDIES**

1. Abderrahman BH, Saleh MY. Investigating knowledge and attitudes of blood donors and barriers concerning blood donation in Jordan. *Procedia-Social and Behavioral Sciences* 2014; 116: 2146-2154. doi: 10.1016/j.sbspro.2014.01.535.
2. Abera B, Mohammed B, Betela W, Yimam R, Oljira A, Ahmed M, et al. Knowledge, attitude, and practice towards blood donation among health care providers in hospitals at Bahir Dar City, Ethiopia. *Transfus Apher Sci* 2017; 56: 434-438. doi: 10.1016/j.transci.2017.04.005.
3. Abolfotouh MA, Al-Assiri MH, Al-Omani M, Al Johar A, Al Hakbani A, Alaskar AS. Public awareness of blood donation in Central Saudi Arabia. *Int J Gen Med* 2014; 7: 401. doi: 10.2147/IJGM.S67187.
4. Agrawal A, Tiwari AK, Ahuja A, Kalra R. Knowledge, attitude and practices of people towards voluntary blood donation in Uttarakhand. *Asian J Transfus Sci* 2013; 7: 59. doi: 10.4103/0973-6247.106740.
5. Ahmed M, Saeed M, Waheed U, Mujtaba A, Hanif A, Khalid A, et al. Perception of blood donation among Pakistani youth. [PAFMJ 2020; 70: 1360-1365.](#)
6. Alam M, El Din Masalmeh B. Knowledge, attitudes and practices regarding blood donation among the Saudi population. *Saudi Med J* 2004; 25: 318-21. PMID: 15048169.
7. Alanzi T, Alsaheed B. Use of social media in the blood donation process in Saudi Arabia. *J Blood Med* 2019; 10: 417. doi: 10.2147/JBM.S217950.
8. Alfieri S. Representations and motivations of blood donation in adolescence through a mixed method approach. *Transfus Apher Sci* 2017; 56: 723-731. doi: 10.1016/j.transci.2017.08.023.
9. Alfouzan N. Knowledge, attitudes, and motivations towards blood donation among King Abdulaziz Medical City population. *Int J Family Med* 2014; 2014: 539670. doi: 10.1155/2014/539670.
10. Alharbi SH, Alateeq FA, Ahmed IB, Alsogair AAA, Al-Rashdi YDA, Aldugiemani TZ, et al. Assessment of levels of awareness towards blood donation in Saudi Arabia. *AIMS public Health* 2018; 5: 324. doi: 10.3934/publichealth.2018.3.324.
11. Alva MA, Alonso LC, Oscar TQ, Meneses-Claudio B, Zamora BI, Belinda AG, et al. YAWARweb: Pilot Study about the usage of a Web Service to Raise Awareness of Blood Donation Campaigns on University Campuses in Lima, Peru. *IJACSA* 2019; 10: 402-407. doi: 10.14569/IJACSA.2019.0100755.
12. Al-Johar A-W, Al-Saud A, Abalkhail Y, Jawdat T, Al-Khamees S, Faisal A-T, et al. Why do-Saudi women refrain donating their blood?-a study on the attitude, belief and motivation of Saudi Female university students towards blood donation. *Clin Lab* 2016; 62: 771-779. doi: 10.7754/clin.lab.2015.150718.
13. Amatya M. Study on knowledge, attitude and practice of blood donation among students of different colleges of Kathmandu, Nepal. [IJPBA 2013; 4: 424-428.](#)
14. Amatya M, Prajapati R, Yadav R. Knowledge and practice of blood donation: a comparison between medical and non-medical Nepalese students. *Nepal Med Coll J* 2012; 14: 283-286. PMID: 24579535.
15. Ambati B, Ambati J, Rao A. Dynamics of knowledge and attitudes about AIDS among the educated in southern India. *AIDS care* 1997; 9: 319-330. doi: 10.1080/09540129750125118.
16. Anderson L, Newell K, Kilcoyne J. "Selling blood": characteristics and motivations of student plasma donors. *Sociological Spectrum* 1999; 19: 137-162. doi: 10.1080/027321799280217.
17. Anwer MO, Fawwad SHU, Anwer S, Ali A. Attitude toward blood donation among medical and nonmedical students across Karachi. *Asian J Transfus Sci* 2016; 10: 113. doi: 10.4103/0973-6247.187937.
18. Ariffin SM, Rafi N, Aung KT. Knowledge, attitude, and practice of nursing and computer science students on blood donation. A comparison study. *Age* 2017; 21: 21-23. doi: 10.9790/1959-0605047377.
19. Asamoah-Akuoko L. Evolving strategies to encourage repeat donations among first time voluntary and replacement blood donors in southern Ghana. Available at: <https://core.ac.uk/outputs/186329381>. doi: 10.17638/03028674.
20. Asamoah-Akuoko L, Ullum H, Appiah B, Hassall OW, Ndanu T, Adongo P, et al. Determinants of intention to return to donate blood among first-time blood donors in Ghana. *Vox Sang* 2021; 116: 324-335. doi: 10.1111/vox.13026.
21. Asenso-Mensah K, Achina G, Appiah R, Owusu-Ofori S, Allain JP. Can family or replacement blood donors become regular volunteer donors? *Transfusion* 2014; 54: 797-804. doi: 10.1111/trf.12216.
22. Asmawi UMM, Osman M, Norimah Said MM. Barriers for blood donation in non-blood donors: A qualitative study. *Envir Behav Proc J* 2019; 4: 59-64. doi: 10.21834/e-bpj.v4i10.1622.
23. Atherley A, Taylor Jr C, Whittington A, Jonker C. Knowledge, attitudes and practices towards blood donation in Barbados. *Transfus Med* 2016; 26: 415-421. doi: 10.1111/tme.12359.
24. Atif M, Shabaz B, Bukhari SNA, Younas S, Ejaz H. Knowledge and Attitude towards Blood Donation in Educated and Illiterate Blood Donors Attending a Tertiary Care Hospital in Lahore. [PJMHS 2019; 13: 166-168.](#)
25. Bagot KL, Bove LL, Masser BM, Bednall TC, Buzza M. Perceived deterrents to being a plasmapheresis donor in a voluntary, nonremunerated environment. *Transfusion* 2013; 53: 1108-1119. doi: 10.1111/j.1537-2995.2012.03891.x.
26. Bagot KL, Masser BM, White KM. A novel approach to increasing inventory with the current panel: increasing donation frequency by asking for a different blood product. *Transfusion* 2015; 55: 1294-1302. doi: 10.1111/trf.12990.
27. Baig M, Habib H, Haji AH, Alsharief FT, Noor AM, Makki RG. Knowledge, misconceptions and motivations towards blood donation among university students in KSA. *Pak J Med Sci* 2013; 29: 1295. doi: 10.12669/pjms.296.4137.
28. Gupta AM, Bajpai M. Delayed adverse events in male plateletpheresis donors: Initial insights on donor safety. *J Clin Apher* 2020; 35: 18-24. doi: 10.1002/jca.21753.
29. Gupta AM, Bajpai M. The impact of delayed and immediate adverse events on the intention of future donations in whole blood and plateletpheresis donors. *J Clin Apher* 2021; 36: 621-627. doi: 10.1002/jca.21902.
30. Bani M, Strepparava M, Giussani B. Gender differences and frequency of whole blood donation in Italian donors: Even though I want to, I cannot? *Transfus Apher Sci* 2014; 50: 81-86. doi: 10.1016/j.transci.2013.11.001.
31. Bankole O, Mabekoje O. Awareness and opinions about HIV/AIDS among secondary school teachers in Ogun State, Nigeria. [Scientific Research and Essay 2008; 3: 245-253.](#)
32. Bastani R, Erickson PA, Marcus AC, Maxwell AE, Capell FJ, Freeman H, et al. AIDS-related attitudes and risk behaviors: a survey of a random sample of California heterosexuals. *Prev Med* 1996; 25: 105-117. doi: 10.1006/pmed.1996.0036.
33. Batiha AM, AlBashtawy M. Knowledge of Philadelphia University students regarding blood donation. *Transfus Med* 2013; 23: 195-198. doi: 10.1111/tme.12027.
34. Benedict N, Usimenahon A, Alexander NI, Isi A. Knowledge, attitude and practice of voluntary blood donation among physicians in a tertiary health facility of a developing country. *IJBTI* 2012; 2: 4. doi: 10.5348/ijbti-201270A2.
35. Bertoni N, Singer M, Silva CM, Clair S, Malta M, Bastos FI. Knowledge of AIDS and HIV transmission among drug users in Rio de Janeiro, Brazil. *Harm Reduct J* 2011; 8: 1-10. doi: 10.1186/1477-7517-8-5.
36. Beyene GA. Voluntary blood donation knowledge, attitudes, and practices in Central Ethiopia. *Int J Gen Med* 2020; 13: 67. doi: 10.2147/IJGM.S246138.
37. Bhalwar R, Jayaram J. Community based study of AIDS awareness and attitudes among school and college-going teenagers from rural background. *Med J Armed Forces India* 2003; 59: 7-11. doi: 10.1016/S0377-1237(03)80094-1.
38. Bhattacharya G, Cleland C, Holland S. Knowledge about HIV/AIDS, the perceived risks of infection and sources of information of Asian-Indian adolescents born in the USA. *Aids Care* 2000; 12: 203-209. doi: 10.1080/09540120050001887.
39. Bilal M, Haseeb A, Zahid I, Lashkerwala SS, Saeeduddin F, Saad M, et al. Knowledge, attitudes and perceptions among non-blood donor female health care professionals. *Glob J Health Sci* 2016; 8: 203. doi: 10.5539/gjhs.v8n4p203.



40. Bourne P, Richards S, Holder-Nevins D. Knowledge, Attitude, Practices and Readiness among University Science Students toward Non-Remunerated Blood Donation in a Middle-Income Developing Country. *TAF Prev Med Bull* 2013; 12: 529-538. doi: 10.5455/pmb.1-1344974030.
41. Bove LL, Bednall T, Masser B, Buzza M. Understanding the plasmapheresis donor in a voluntary, nonremunerated environment. *Transfusion* 2011; 51: 2411-2424. doi: 10.1111/j.1537-2995.2011.03168.x.
42. Bravo M, Kamel H, Custer B, Tomasulo P. Factors associated with fainting-before, during and after whole blood donation. *Vox Sang* 2011; 101: 303-312. doi: 10.1111/j.1423-0410.2011.01494.x.
43. Buciniene I, Stonienė L, Blazevičienė A, Kazlauskaitė R, Skudienė V. Blood donors' motivation and attitude to non-remunerated blood donation in Lithuania. *BMC public health* 2006; 6: 1-8. doi: 10.1186/1471-2458-6-166.
44. Cable RG, Spencer BR. Iron supplementation by blood donors: demographics, patterns of use, and motivation. *Transfusion* 2019; 59: 2857-2864. doi: 10.1111/trf.15407.
45. Casebeer AW. Giving blood: An exploration of the determinants of the gift relationship: University of Colorado at Denver; 2002. ProQuest Number: 3053602.
46. Charbonneau J, Tran NYL. The symbolic roots of blood donation. *Transfusion* 2013; 53 (Suppl 5): 1725-179S. doi: 10.1111/trf.12477.
47. Charbonneau J, Cloutier M-S, Carrier É. Whole blood and apheresis donors in Quebec, Canada: Demographic differences and motivations to donate. *Transfus Apher Sci* 2015; 53: 320-328. doi: 10.1016/j.transci.2015.06.001.
48. Charbonneau J, Cloutier MS, Fainstein B. How do people become plasma and platelet donors in a VNR context? *J Clin Apher* 2018; 33: 236-248. doi: 10.1002/jca.21577.
49. Checkley L, Motwani G, Wange IC, Nwanna-Nzewunwa O, Kirya F, Ajiko MM, et al. Assessment of blood donation and transfusion in Eastern Uganda: a mixed-methods study. *Ann Glob Health* 2019; 85: 59. doi: 10.5334/aogh.2426.
50. Chen L, Ma Z. The construct and measurement of perceived risk of nonremunerated blood donation: evidence from the Chinese public. *Biomed Res Int* 2015; 2015: 302043. doi: 10.1155/2015/302043.
51. Chequer P, Paiva L, Hudes E, Piazza T, Rodrigues L, Hearst N. AIDS and condoms in Brasilia: a telephone survey. *AIDS Educ Prev* 1997; 9: 472-484. PMID: 9391661.
52. Chopra D, Jauhari N. Knowledge attitude & practices towards voluntary blood donation among medical students in Barabanki. [IJCH 2015; 27: 386-390.](#)
53. Chuang HT, Atkinson M. AIDS knowledge and high-risk behaviour in the chronic mentally ill. *Can J Psychiatry* 1996; 41: 269-272. doi: 10.1177/070674379604100502.
54. Cicolini G, Comparcini D, Alfieri S, Zito E, Marta E, Tomietto M, et al. Nursing students' knowledge and attitudes of blood donation: a multicentre study. *J Clin Nurs* 2019; 28: 1829-1838. doi: 10.1111/jocn.14792.
55. Ciepela O, Jaworska A, Łacheta D, Falkowska N, Popko K, Demkow U. Awareness of blood group and blood donation among medical students. *Transfus Apher Sci* 2017; 56: 858-64. doi: 10.1016/j.transci.2017.10.002.
56. Conceição VMD, Araújo JS, Oliveira RAA, Santana MEd, Zago MMF. Perceptions of donors and recipients regarding blood donation. *Rev Bras Hematol Hemoter* 2016; 38: 220-224. doi: 10.1016/j.bjhh.2016.05.006.
57. Covin R, Rich N, Aysola A. Upper-extremity deep venous thrombosis complicating whole-blood donation. *Transfusion* 2004; 44: 586-90. doi: 10.1111/j.1537-2995.2004.03278.x.
58. Damulak O, Jatau E, Dacob D, Nokshuan S, Reng T. Awareness, knowledge and attitude of students of a plateau state tertiary institution to blood donation. *Medical Science* 2016; 20: 45-52.
59. Darega B, Dida N, Tesfaye T, Lencha B. Voluntary blood donation practices and associated factors among regular undergraduate Madawalabu University Students, Southeast Ethiopia: a facility-based cross sectional study. [J Blood Disord Transfus S 2015; 5: S5-005.](#)
60. Dawadi P, Khadka S, Khanal MC, Thapa RK. Blood Donation Practice among Undergraduate Students in a Tertiary Care Hospital: A Descriptive Cross-sectional Study. *JNMA* 2020; 58: 998. doi: 10.31729/jnma.5288.
61. Dean BW, Hewitt SN, Begos MC, Gomez A, Messam LLM. An analysis of blood donation barriers experienced by North American and Caribbean university students in Grenada, West Indies. *Transfus Apher Sci* 2018; 57: 40-45. doi: 10.1016/j.transci.2017.11.026.
62. Denman S, Pearson J, Moody D, Davis P, Madeley R. Theatre in education on HIV and AIDS: a controlled study of schoolchildren's knowledge and attitudes. *Health Education Journal* 1995; 54: 3-17. doi: 10.1177/001789699505400102.
63. Denman S, Pearson J, Davis P, Moody D. A survey of HIV-and AIDS-related knowledge, beliefs and attitudes among 14-year-olds in Nottinghamshire. *Educational Research* 1996; 38: 93-99. doi: 10.1080/0013188960380107.
64. Dilsad S, Tanriover O, Hidiröglu S, Gurbuz Y, Karavus M. Knowledge, attitudes and beliefs of Turkish women towards blood donation. *J Pakistan Med Assoc* 2014; 64: 869-873. PMID: 25252509.
65. Doshi D, Karunakar P, Satyanarayana D, Reddy BS. Blood donation-are we willing?-a cross-sectional study among dental students. *Clin Lab* 2018; 64: 225-232. doi: 10.7754/Clin.Lab.2017.170704.
66. Dubea A, Sonker A, Chaurasia R, Chaudhary R. Knowledge, attitude and beliefs of people in North India regarding blood donation. *Blood Transfus* 2014; 12 (Suppl 1): s21. doi: 10.2450/2012.0058-12.
67. Dubea A, Sonker A, Chaudhary RK. Knowledge, attitude, and beliefs of young, college student blood donors about Human immunodeficiency virus. *Asian J Transfus Sci* 2014; 8: 39. doi: 10.4103/0973-6247.126689.
68. Ehimen F, Osagiede E, Abah S, Enahoro F, Itaman U. Assessment of the knowledge, attitude and practice of voluntary non-remunerated blood donation among residents of Ekpoma, a peri-urban community in Edo State. *Nigerian Journal of Medicine*. 2016; 25: 348-357. PMID: 30011173.
69. Elias E, Mauka W, Philemon RN, Damian DJ, Mahande MJ, Msuya SE. Knowledge, attitudes, practices, and factors associated with voluntary blood donation among university students in Kilimanjaro, Tanzania. *J Blood Transfus* 2016; 2016: 8546803. doi: 10.1155/2016/8546803.
70. Elliot N, Crump J, McGuire A, Bagshaw S, Chambers S. Knowledge, attitudes and behaviour towards HIV infection among family planning clinic attendees: changes between 1991 and 1997. *N Z J Med* 1999; 112: 121-123. PMID: 10326801.
71. El-Qaderi S. Knowledge and misconceptions about HIV/AIDS transmission modes (routes) among a sample of high school students in Jordan. [Public Health Medicine 2004; 5: 117-120.](#)
72. Erwin K, Adams V, Le P. Glorious deeds: work unit blood donation and postsocialist desires in urban China. *Body & Society* 2009; 15: 51-70. doi: 10.1177/1357034X09103437.
73. Eshak ES, Ghazawy ER, Rahman A-E, Tarek A, Hafez SM. Crossing the wide gap between positive attitude towards blood donation and its poor practice among university students: can knowledge and demographic characteristics help? *J Public Health (Berl.)* 2019; 27: 329-337. doi: 10.1007/s10389-018-0954-0.
74. Ferdous AS, Polonsky M, Brijnath B, Renzaho A. *Designing social marketing activities to impact the shaping of expectations of migrants in health service encounters: the case of African migrant blood donation in Australia.* *Innovations in Social Marketing and Public Health Communication*: Springer; 2015. p. 349-64. doi: 10.1007/978-3-319-19869-9\_20.
75. Ferguson E, Lawrence C. Altruistic and warm-glow motivations: Differentiating first time from repeat donors. *TPM-Testing, Psychometrics, Methodology in Applied Psychology* 2019; 26. doi: 10.4473/TPM26.4.10.
76. Fernández-Montoya A, López-Berrio A, Luna del Castillo J. How some attitudes, beliefs and motivations of Spanish blood donors evolve over time. *Vox Sang* 1998; 74: 140-147. doi: 10.1046/j.1423-0410.1998.7430140.x.
77. Ferreira S, de Almeida-Neto C, Nishiya A, Oliveira C, Ferreira JE, Alencar C, et al. Demographic, risk factors and motivations among blood donors with reactive serologic tests for syphilis in São Paulo, Brazil. *Transfus Med* 2014; 24: 169-175. doi: 10.1111/tme.12124.
78. Frye V, Caltabiano M, Kessler DA, Schaffler H, Reboza M, Hillyer CD, et al. Evaluating a program to increase blood donation among racial and ethnic minority communities in New York City. *Transfusion* 2014; 54: 3061-3067. doi: 10.1111/trf.12767.

79. Gader AGMA, Osman AMA, Al Gahtani FH, Farghali MN, Ramadan AH, Al-Momen AKM. Attitude to blood donation in Saudi Arabia. *Asian J Transfus Sci* 2011; 5: 121. doi: 10.4103/0973-6247.83235.
80. Gammon RR, Kozel T, Morel P, Kendrick C. Evaluation of iron stores by zinc protoporphyrin analysis in blood donors. *Lab Med* 2018; 49: 311-315. doi: 10.1093/labmed/lmy007.
81. Gani AP. Knowledge, attitude and prevalence of blood donation among college students in Chennai. *IJPHRD* 2017; 8: 35-40. doi: 10.5958/0976-5506.2017.00008.0.
82. Gao L, Wang Q. Survey on knowledge, attitude and practice about blood donation among continuing medical education (CME) students in Sichuan province, China. *Transfus Apher Sci* 2017; 56: 454-458. doi: 10.1016/j.transci.2017.05.004.
83. Getta HA, Ahmad HA, Rahman HS, Ahmed GA, Abdullah R. Medical and laboratory assessment for regular blood donors in Sulaimani Blood Bank, Iraq. *Patient Preference & Adherence* 2018; 12. doi: 10.2147/PPA.S157221.
84. Gilani I, Kayani ZA, Atique M. Knowledge, attitude and practices (kap) regarding blood donation prevalent in medical and paramedical personnel. *J Coll Physicians Surg Pak* 2007; 17: 473-476. PMID: 17785125.
85. Glynn SA, Kleinman SH, Schreiber GB, Zuck T, Mc Combs S, Bethel J, et al. Motivations to donate blood: demographic comparisons. *Transfusion* 2002; 42: 216-225. doi: 10.1046/j.1537-2995.2002.00008.x.
86. Glynn SA, Smith JW, Schreiber GB, Kleinman SH, Nass CC, Bethel J, et al. Repeat whole-blood and plateletpheresis donors: unreported deferrable risks, reactive screening tests, and response to incentive programs. *Transfusion* 2001; 41: 736-743. doi: 10.1046/j.1537-2995.2001.41060736.x.
87. Glynn SA, Schreiber GB, Murphy EL, Kessler D, Higgins M, Wright DJ, et al. Factors influencing the decision to donate: racial and ethnic comparisons. *Transfusion* 2006; 46: 980-990. doi: 10.1111/j.1537-2995.2006.00831.x.
88. Goldman M, Uzicanin S, Scalia V, O'Brien SF. Iron deficiency in Canadian blood donors. *Transfusion* 2014; 54: 775-779. doi: 10.1111/trf.12380.
89. Goldman M, Osmond L, Yi QL, Cameron-Choi K, O'Brien SF. Frequency and risk factors for donor reactions in an anonymous blood donor survey. *Transfusion* 2013; 53: 1979-1984. doi: 10.1111/trf.12011.
90. Gomez A, Messam L, Toner L. Collaboration and research as key elements for strengthening blood donation in developing nations: the case of Grenada, West Indies. *West Indian Med J* 2013; 62. PMID: 24171328.
91. Gonzalez TT, Sabino EC, Chen S, Salles NA, Chamone DA, McFarland W, et al. Knowledge, attitudes and motivations among blood donors in Sao Paulo, Brazil. *AIDS and Behavior* 2008; 12: 39-47. doi: 10.1007/s10461-008-9391-3.
92. Grossman B, Watkins AR, Fleming F, DeBaun MR. Barriers and motivators to blood and cord blood donations in young African-American women. *Am J Hematol* 2005; 78: 198-202. doi: 10.1002/ajh.20308.
93. Hancock T, Mikhail BI, Santos A, Nguyen A, Nguyen H, Bright D. A comparison of HIV/AIDS knowledge among high school freshmen and senior students. *J Community Health Nurs* 1999; 16: 151-163. doi: 10.1207/S15327655JCHN1603\_2.
94. Harrington AH. Blood banks in Kumasi, Ghana: Social barriers preventing volunteer blood donations. [University of Michigan Undergraduate Research Journal](#) 2012; 9: 4-7.
95. Harrington M, Sweeney MR, Bailie K, Morris K, Kennedy A, Boilson A, et al. What would encourage blood donation in Ireland? *Vox Sang* 2007; 92: 361-367. doi: 10.1111/j.1423-0410.2007.00893.x.
96. Hong J, Loke AY. Hong Kong young people's blood donation behavior. *Asian J Transfus Sci* 2011; 5: 49. doi: 10.4103/0973-6247.76000.
97. Hosain G, Anisuzzaman M, Begum A. Knowledge and attitude towards voluntary blood donation among Dhaka University students in Bangladesh. *East Afr Med J* 1997; 74: 549-53. PMID: 9487428.
98. Imperato AM. Acquired immunodeficiency syndrome and suburban adolescents: Knowledge, attitudes, behaviors and risks. *J Community Health* 1996; 21: 329-347. doi: 10.1007/BF01702786.
99. Inaba S, Takashi M, Matsuzaki K, Ono Y, Nakajima K, Shibata R, et al. Analysis of a questionnaire on adverse reactions to blood donation in Japan. *Transfus Apher Sci* 2013; 48: 21-34. doi: 10.1016/j.transci.2012.07.012.
100. Jaafar JR, Chong ST, Alavi K. Experience as factors associated with repeat blood donation among university students in Malaysia. [Southeast Asian J Trop Med Public Health](#) 2017; 48: 1118-1126.
101. Jacobs B, Berege Z. Attitudes and beliefs about blood donation among adults in Mwanza Region, Tanzania. *East Afr Med J* 1995; 72: 345-348. PMID: 7498000.
102. James AB, Schreiber GB, Hillyer CD, Shaz BH. Blood donations motivators and barriers: a descriptive study of African American and white voters. *Transfus Apher Sci* 2013; 48: 87-93. doi: 10.1016/j.transci.2012.07.005.
103. Japar S, Yahya NA, Raman RA, Sani AM, Halain AA, Geok K, et al. Knowledge, Attitude and Practice of Blood Donation among Undergraduate Students in a Public University, Malaysia. *RJPT* 2018; 11: 3478-3482. doi: 10.31838/ijpr/2018.10.04.008.
104. Javadzadeh Shahshahani H. Why don't women volunteer to give blood? A study of knowledge, attitude and practice of women about blood donation, Yazd, Iran, 2005. *Transfus Med* 2007; 17: 451-454. doi: 10.1111/j.1365-3148.2007.00803.x.
105. Javadzadeh Shahshahani H, Yavari M, Attar M, Ahmadiyeh M. Knowledge, attitude and practice study about blood donation in the urban population of Yazd, Iran, 2004. *Transfus Med* 2006; 16: 403-409. doi: 10.1111/j.1365-3148.2006.00699.x.
106. Javaeed A, Kousar R, Farooq A, Hina S, Ghauri SK, Tabbasum T. Knowledge, attitude, and practice of blood donation among undergraduate medical students in Azad Kashmir. *Cureus* 2020; 12: e7733. doi: 10.7759/cureus.7733.
107. Jemberu YA, Esmael A, Ahmed KY. Knowledge, attitude and practice towards blood donation and associated factors among adults in Debre Markos town, Northwest Ethiopia. *BMC Hematol* 2016; 16: 1-8. doi: 10.1186/s12878-016-0062-8.
108. Joshi D, Meakin R. Views and attitudes towards blood donation: a qualitative investigation of Indian non-donors living in England. *BMJ Open* 2017; 7: e018279. doi: 10.1136/bmjopen-2017-018279.
109. Kabinda JM, Miyanga SA, Ramazani SY, Dramaix M-W. Assessment of knowledge, attitude and practice of the general population of Bukavu in the Democratic Republic of Congo on blood donation and blood transfusion. *Health* 2014; 6: 2525. doi: 10.4236/health.2014.618291.
110. Kamel H, Tomasulo P, Bravo M, Wiltbank T, Cusick R, James RC, et al. Delayed adverse reactions to blood donation. *Transfusion* 2010; 50: 556-565. doi: 10.1016/j.transci.2010.07.007.
111. Kar S, Bandyopadhyay S, Singh A. Determinants of participation of college students in a blood donation camp organized in Naraingarh town, Haryana. [Bulletin](#) 2004; 38: 71-77.
112. Karacan E, Seval GC, Aktan Z, Ayli M, Palabiyikoglu R. Blood donors and factors impacting the blood donation decision: motives for donating blood in Turkish sample. *Transfus Apher Sci* 2013; 49: 468-473. doi: 10.1016/j.transci.2013.04.044.
113. Karacaoglu Y, Öncü E. The effect of the video and brochure via donor recruitment on fear, anxiety and intention: Randomized controlled trial. *Transfus Apher Sci* 2020; 59: 102698. doi: 10.1016/j.transci.2019.102698.
114. Kasraian L. Causes of discontinuity of blood donation among donors in Shiraz, Iran: cross-sectional study. *Sao Paulo Med J* 2010; 128: 272-275. doi: 10.1590/s1516-31802010000500006.
115. Kasraian L, Maghsudlu M. Blood donors' attitudes towards incentives: influence on motivation to donate. *Blood Transfus* 2012; 10: 186. doi: 10.2450/2011.0039-11.
116. Kasraian L, Hosseini S, Dehbidi S, Ashkani-Esfahani S. Return rate in blood donors: a 7-year follow up. *Transfus Med* 2020; 30: 141-147. doi: 10.1111/tme.12647.
117. Kasraian L, Ashkani-Esfahani S, Forouzandeh H. Reasons of under-representation of Iranian women in blood donation. *Hematol Transfus Cell Ther* 2021; 43: 256-262. doi: 10.1016/j.htct.2020.03.009.
118. Kayani SM, Shafiq A, Basray R. Perception of people towards blood donation its benefits and harms. *Indo Am J P Sci* 2019; 06: 11250-11253. doi: 10.5281/zenodo.3236381.
119. Kebede L, Berhan A, Alemneh N, Dagne A, Nigus Y, Yeshanew S, et al. Knowledge, attitude, practice and associated factors that hinder blood donation practices among the residents in Ilu Aba Bor and Buno Bedelle zones, south western Ethiopia. *Indo Am J P Sci* 2019; 6: 12401-10. doi: 10.5281/zenodo.3250910.

120. Khan MAN, Rosly NAM, Majeed ABA, Ismail NE. Knowledge of modes of HIV transmission among public secondary school students in urban and rural areas in Malaysia. *Pak J Pharm Sci* 2018; 31: 1985-1990. PMID: 30150198.
121. Klinkenberg EF, Romeijn B, de Kort WL, Merz EM. Reasons to end the donor career: a quantitative study among stopped blood donors in the Netherlands. *Transfus Med* 2018; 28: 200-207. doi: 10.1111/tme.12442.
122. Kowsalya V, Vijayakumar R, Chidambaram R, Sri Kumar R, Reddy EP, Latha S, et al. A study on knowledge, attitude and practice regarding voluntary blood donation among medical students in Puducherry, India. *Pak J Biol Sci* 2013; 16: 439-442. doi: 10.3923/pjbs.2013.439.442.
123. Kristy S. Toward understanding Vietnamese attitudes, beliefs and practices regarding blood donation. *Social Sciences in Health* 1998; 4: 154-162.
124. Kuruvatti J, Prasad V, Williams R, Harrison MA, Jones R. Motivations for donating blood and reasons why people lapse or never donate in Leeds, England: a 2001 questionnaire-based survey. *Vox Sang* 2011; 101: 333-338. doi: 10.1111/j.1423-0410.2011.01488.x.
125. Leigh L, Bist M, Alexe R. Marketing blood drives to students: a case study. *Int J Health Care Qual Assur* 2007; 20: 84-95. doi: 10.1108/09526860710721259.
126. Lindley LL, Coleman JD, Gaddist BW, White J. Informing faith-based HIV/AIDS interventions: HIV-related knowledge and stigmatizing attitudes at Project FAITH churches in South Carolina. *Public Health Rep* 2010; 125 (Suppl 1): 12-20. doi: 10.1177/00335491012505103.
127. Lynch R, Cohn S. Donor understandings of blood and the body in relation to more frequent donation. *Vox Sang* 2018; 113: 350-356. doi: 10.1111/vox.12641.
128. Maghsudlu M, Nasizadeh S. Iranian blood donors' motivations and their influencing factors. *Transfus Med* 2011; 21: 247-252. doi: 10.1111/j.1365-3148.2011.01077.x.
129. Mahon-Daly PM. Blood, society and the gift: an ethnography of change in the gift relationship. [School of Social Sciences Theses; 2012.](#)
130. Malako D, Yoseph F, Bekele ML. Assessment of knowledge, attitude and practice and associated factors of blood donation among health care workers in Ethiopia: a cross-sectional study. *BMC Hematol* 2019; 19: 1-8. doi: 10.1186/s12878-019-0140-9.
131. Malik MR, Majid S, Laghari MS. Determinants of blood donation behaviour of general public in Pakistan. [PJMHS 2010; 80: 90.](#)
132. Marantidou O, Loukopoulou L, Zervou E, Martinis G, Egglezou A, Fountouli P, et al. Factors that motivate and hinder blood donation in Greece. *Transfus Med* 2007; 17: 443-450. doi: 10.1111/j.1365-3148.2007.00797.x.
133. Martín-Santana JD, Beerli-Palacio A, Romero-Domínguez L. Recruitment strategies: non-donor segmentation based on intrinsic and extrinsic stimuli. *Vox Sang* 2020; 115: 47-59. doi: 10.1111/vox.12858.
134. Masser BM, White KM, Terry DJ. Beliefs underlying the intention to donate again among first-time blood donors who experience a mild adverse event. *Transfus Apher Sci* 2013; 49: 278-284. doi: 10.1016/j.transci.2013.06.008.
135. Masser BM, Bove LL, White KM, Bagot KL. Negative experiences and donor return: An examination of the role of asking for something different. *Transfusion* 2016; 56: 605-613. doi: 10.1111/trf.13390.
136. Mathew SM, King MR, Glynn SA, Dietz SK, Caswell SL, Schreiber GB. Opinions about donating blood among those who never gave and those who stopped: a focus group assessment. *Transfusion* 2007; 47: 729-735. doi: 10.1111/j.1537-2995.2007.01177.x.
137. McVittie C, Harris L, Tiliopoulos N. "I intend to donate but...": Non-donors' views of blood donation in the UK. *Psychol Health Med* 2006; 11: 1-6. doi: 10.1080/13548500500159455.
138. Meinia SK, Kumar Y, Meinia A, Singh G, Dutt N. A study to assess the knowledge, attitude, and practices about voluntary blood donation amongst the undergraduate medical students in Solan, North India. *Int J Med Sci Public Health* 2016; 5: 2550. doi: 10.4103/jfmpc.jfmpc\_54\_17.
139. Melku M, Asrie F, Shiferaw E, Woldu B, Yihunew Y, Asmelash D, et al. Knowledge, attitude and practice regarding blood donation among graduating undergraduate health science students at the University of Gondar, Northwest Ethiopia. *Ethiop J Health Sci* 2018; 28: 571-582. doi: 10.4314/ejhs.v28i5.8.
140. Mirza H, Khan F, Naeem FJ, Ashraf B. Blood safety and donation knowledge, attitude and practice (KAP) among 1st year medical students at LMDC, Lahore. [Pak J Med Health Sci 2015; 9: 992-994.](#)
141. Misganaw C, Tenkir M, Deresea A, Tesfaye M, Tessema TT, Taye H. The level and associated factors of knowledge, attitude and practice of blood donation among health science students of Addis Ababa University. [Int J Med Health Sci Res 2014; 1: 105-118.](#)
142. Mishra SK, Sachdev S, Marwaha N, Avasthi A. Study of knowledge and attitude among college-going students toward voluntary blood donation from north India. *J Blood Med* 2016; 7: 19. doi: 10.2147/JBM.S91088.
143. Misje AH, Bosnes V, Gåsdal O, Heier HE. Motivation, recruitment and retention of voluntary non-remunerated blood donors: a survey-based questionnaire study. *Vox Sang* 2005; 89: 236-244. doi: 10.1111/j.1423-0410.2005.00706.x
144. Mohammed H, Osman T. Voluntary blood donation among medical students in a resource-limited country. [JHCDC 2016; 2: 257-267.](#)
145. Mohammed S, Essel HB. Motivational factors for blood donation, potential barriers, and knowledge about blood donation in first-time and repeat blood donors. *BMC Hematol* 2018; 18: 1-9. doi: 10.1186/s12878-018-0130-3.
146. Montoya ID. Changes in economically disadvantaged adolescents' knowledge and beliefs about HIV/AIDS. *Clin Lab Sci* 2001; 14: 167. PMID: 11517627.
147. Moog R. Implementation of concurrent red blood cell and platelet collection by apheresis in a university haemapheresis unit. *Transfus Med* 2004; 14: 145-150. doi: 10.1111/j.0958-7578.2004.00490.x.
148. Morand C, Coudurier N, Rolland C, Thoret S, Legrand D, Tiberghien P, et al. Prevention of syncopal-type reactions after whole blood donation: a cluster-randomized trial assessing hydration and muscle tension exercise. *Transfusion* 2016; 56: 2412-2421. doi: 10.1111/trf.13716.
149. Mousavi F, Tavabi A, Golestan B, Ammar-Saeedi E, Kashani H, Tabatabaei R, et al. Knowledge, attitude and practice towards blood donation in Iranian population. *Transfus Med* 2011; 21: 308-317. doi: 10.1111/j.1365-3148.2011.01080.x.
150. Mulatu K, Hailu T, Yegezu A, Tena B. Assessment of knowledge, attitude and practice on blood donation in Aman sub city residents, south west, Ethiopia, 2015. *Health Sci J* 2017; 11: 1.
151. Mumtaz Z, Bowen S, Mumtaz R. Meanings of blood, bleeding and blood donations in Pakistan: implications for national vs global safe blood supply policies. *Health Policy and Planning* 2012; 27: 147-155. doi: 10.1093/heapol/czr016.
152. Muthivhi T, Olmsted M, Park H, Sha M, Raju V, Mokoena T, et al. Motivators and deterrents to blood donation among Black South Africans: a qualitative analysis of focus group data. *Transfus Med* 2015; 25: 249-258. doi: 10.1111/tme.12218.
153. Mwaba K, Kelkelame M. Blood donation behaviour and beliefs among a sample of high school students in Mmabatho. *Curatationis* 1995; 18: 2-3. doi: 10.4102/curatationis.v18i3.1356.
154. Namba N, Ishimaru F, Kondo G, Hashizume T, Kunii N, Shibata R, et al. Syncopal-type reactions tend to be delayed and result in falls among elderly blood donors. *Vox Sang* 2021; 116: 36-41. doi: 10.1111/vox.12981.
155. Narayanan D, Rajan A. A study of motivational factors, incentive preferences, and unpleasant events during blood donation among blood donors. *J Evolution Med Dent Sci* 2020; 9: 3735-3739. doi: 10.14260/jemds/2020/820.
156. Natukunda PB, Agaba E, Wabuyi P, Bortolussi R, McBride E. Knowledge, attitudes, and practices about regular, voluntary non-remunerated blood donation in peri-urban and rural communities in Mbarara district, South Western Uganda, and its Impact on maternal health. *JOGC* 2015; 37: 903-904. doi: 10.1016/s1701-2163(16)30028-7.
157. Navkudkar A, Desai P, Rajadhakshaya S. Post-donation telephonic interview: A tool for active follow-up of voluntary whole blood donors for analysis of frequency and predisposing factors of adverse reactions. *Indian Journal of Medical Sciences* 2021; 73: 1-7. doi: 10.25259/IJMS\_499\_2020.
158. Nepal B, Mukhtar Z. Knowledge, Attitude and Practice about voluntary blood donation among young student population of Karachi. *Vox Sang* 2015; 109: 119-120. doi: 10.1111/vox.12306.

159. Newman BH. Arterial puncture phlebotomy in whole-blood donors. *Transfusion* 2001; 41: 1390-1392. doi: 10.1046/j.1537-2995.2001.41111390.x.
160. Newman BH, Graves S. A study of 178 consecutive vasovagal syncopal reactions from the perspective of safety. *Transfusion* 2001; 41: 1475-1479. doi: 10.1046/j.1537-2995.2001.41121475.x.
161. Newman BH, Newman DT, Ahmad R, Roth AJ. The effect of whole-blood donor adverse events on blood donor return rates. *Transfusion* 2006; 46: 1374-1379. doi: 10.1111/j.1537-2995.2006.00905.x.
162. Newman BH, Pichette S, Pichette D, Dzaka E. Adverse effects in blood donors after whole-blood donation: a study of 1000 blood donors interviewed 3 weeks after whole-blood donation. *Transfusion* 2003; 43: 598-603. doi: 10.1046/j.1537-2995.2003.00368.x.
163. Newman BH, Roth AJ. Estimating the probability of a blood donation adverse event based on 1000 interviewed whole-blood donors. *Transfusion* 2005; 45: 1715-1721. doi: 10.1111/j.1537-2995.2005.00595.x.
164. Ngoma AM, Goto A, Yamazaki S, Machida M, Kanno T, Nollet K, et al. Barriers and motivators to blood donation among university students in Japan: development of a measurement tool. *Vox Sang* 2013; 105: 219-224. doi: 10.1111/vox.12044.
165. Nguyen DD, DeVita DA, Hirschler NV, Murphy EL. Blood donor satisfaction and intention of future donation. *Transfusion* 2008; 48: 742-748. doi: 10.1111/j.1537-2995.2007.01600.x.
166. Nilsson Sojka B, Sojka P. The blood-donation experience: perceived physical, psychological and social impact of blood donation on the donor. *Vox Sang* 2003; 84: 120-128. doi: 10.1046/j.1423-0410.2003.00271.x.
167. Nwabueze S, Nnebue C, Azuikwe E, Ezenyeaku C, Anigboso C, Ezemonye O, et al. Perception of blood donation among medical and pharmaceutical science students of Nnamdi Azikiwe University, Awka. *Open Journal of Prev Med* 2014; 4: 515-522. doi: 10.4236/ojpm.2014.47061.
168. Nwogoh B, Aigberadion U, Nwannadi AI. Knowledge, attitude, and practice of voluntary blood donation among healthcare workers at the University of Benin Teaching Hospital, Benin City, Nigeria. *J Blood Transfus* 2013; 2013:797830. doi: 10.1155/2013/797830.
169. Obi S. Antenatal blood donation for pregnant Nigerian mothers: the husbands' perspective. *J Obstet Gynaecol* 2007; 27: 467-469. doi: 10.1080/01443610701405986.
170. O'Brien S, Shao ZJ, Osmond L, Yi QL, Li CY, An QX. Donor motivation in Xi'an, China: comparison with Canadian donors. *Vox Sang* 2013; 104: 200-206. doi: 10.1111/j.1423-0410.2012.01656.x.
171. Ogboghodo E, Ofili A, Ogunbor O, Ogenyi C, Okpala C. Knowledge, attitude and practice of voluntary non-remunerated blood donation among medical students in a tertiary institution in Southern Nigeria. *IRJMS* 2015; 14: 104-117.
172. Öhrner C, Kvist M, Blom Wiberg K, Diedrich B. Why do young men lapse from blood donation? *Vox Sang* 2019; 114: 566-575. doi: 10.1111/vox.12796.
173. Olaiya M, Alakija W, Ajala A, Olatunji R. Knowledge, attitudes, beliefs and motivations towards blood donations among blood donors in Lagos, Nigeria. *Transfus Med* 2004; 14: 13-7. doi: 10.1111/j.0958-7578.2004.00474.x.
174. Ottong J, Asuquo E, Olaniran N, Duke F, Abia R, Team) CP. Community mobilization for blood donation, Cross River State, Nigeria. *Int J Gynaecol Obstet* 1997; 59 (Suppl 2): S119-S125. doi: 10.1016/s0020-7292(97)00156-2.
175. Ou-Yang J, He B, Rong X, Bei CH. Can inactive blood donors be re-recruited? A stratified randomised pilot study. *Transfus Med* 2017; 27: 421-427. doi: 10.1111/tme.12436.
176. Ou-Yang J, Bei CH, He B, Rong X. Factors influencing blood donation: a cross-sectional survey in Guangzhou, China. *Transfus Med* 2017; 27: 256-267. doi: 10.1111/tme.12410.
177. Padhyegurjar MS, Padhyegurjar SB. Interventional study of immediate and long term changes in HIV/AIDS knowledge and attitude among school students in an urban slum in Mumbai. *IJCH* 2012; 24: 9-14.
178. Pandey P, Setya D, Suresh A, George G, Chaudhary C, Kumar P, et al. Survey to assess knowledge, attitude and practices for safe and efficient vein-to-vein transfusion practices and effect of educational intervention in a hospital setting. *Transfus Med* 2020; 30: 475-484. doi: 10.1111/tme.12710.
179. Papagiannis D, Rachiotis G, Symvoulakis EK, Anyfantakis D, Douvlataniotis K, Zilidis C, et al. Blood donation knowledge and attitudes among undergraduate health science students: a cross-sectional study. *Transfus Apher Sci* 2016; 54: 303-308. doi: 10.1016/j.transci.2015.11.001.
180. Pathuri NK, Vasireddy G, Chelimela D, Varahala AM, Nagamuthu EA. Attitude and outlook of medical and non-medical students towards blood donation-a study in Telangana state. *J Evolution Med Dent Sci* 2018; 7: 2944-2949. doi: 10.14260/jemds/2018/663.
181. Patil J, bin Harunarasad AA, binti Azmi N, bin Mohd Junit AH, bin Suaimi MH, Kumar N. A study on knowledge, attitude and practice of voluntary blood donation among the medical undergraduate students. *RJPBCS* 2016; 7: 2408-2412.
182. Polonsky MJ, Renzaho AM, Brijnath B. Barriers to blood donation in African communities in Australia: the role of home and host country culture and experience. *Transfusion* 2011; 51: 1809-1819. doi: 10.1111/j.1537-2995.2010.03053.x.
183. Raghuvanshi B, PeHIAJANI NK, Sinha MK. Voluntary blood donation among students-a cross-sectional study on knowledge and practice vs. attitude. *JCDR* 2016; 10: EC18. doi: 10.7860/JCDR/2016/21957.8733.
184. Randall MB. AIDS knowledge and attitudes among selected high school students: a systems approach: University of Louisville; 1996. ProQuest Number: 1379920.
185. Ray S, Singh Z, Banerjee A. Psychosocial variables of voluntary blood donors at blood bank of a medical college. *Med J Armed Forces India* 2005; 61: 130-132. doi: 10.1016/S0377-1237(05)80007-3.
186. Renzaho AM, Polonsky MJ. Examining demographic and socio-economic correlates of accurate knowledge about blood donation among African migrants in Australia. *Transfus Med* 2012; 22: 321-331. doi: 10.1111/j.1365-3148.2012.01175.x.
187. Renzaho AM, Polonsky MJ. The influence of acculturation, medical mistrust, and perceived discrimination on knowledge about blood donation and blood donation status. *Transfusion* 2013; 53 (Suppl 5): 162S-171S. doi: 10.1111/trf.12476.
188. Rodell M, Lee M. Determination of reasons for cessation of participation in serial plasmapheresis programs. *Transfusion* 1999; 39: 900-903. doi: 10.1046/j.1537-2995.1999.39080900.x.
189. Rolseth S, Stange P, Adamou D, Roald B, Danki-Sillong F, Jourdan P. The acceptability of volunteer, repeat blood donations in a hospital setting in the Adamaoua region of Cameroon. *Transfus Med* 2014; 24: 372-378. doi: 10.1111/tme.12156.
190. Romero-Domínguez L, Martín-Santana JD, Beerli-Palacio A. Segmenting active blood donors according to their barriers to develop retention programs. *Transfus Med Rev* 2019; 33: 176-182. doi: 10.1016/j.tmr.2019.06.004.
191. Rose JP, Geers AL, France JL, France CR. Norm perception and communication for vasovagal symptoms in blood donation. *Transfusion* 2014; 54: 2258-2266. doi: 10.1111/trf.12625.
192. Salaudeen A, Odeh E. Knowledge and behavior towards voluntary blood donation among students of a tertiary institution in Nigeria. *Niger J Clin Pract* 2011; 14: 303-307. doi: 10.4103/1119-3077.86773.
193. Salaudeen A, Musa O, Awoyemi A, Bolarinwa A, Adegboye A, Samuel S. Community survey on blood donation practices in a northern state of Nigeria. *J Prev Med Hyg* 2011; 52: 21-25. PMID: 21710820.
194. Salvadori U, Sandri M, Cemin R, Al-Khaffaf A, Daves M, Maniscalco F, et al. Effect of a liberal versus a restrictive pre-donation blood pressure policy on whole-blood donor adverse reactions. *Vox Sang* 2019; 114: 317-324. doi: 10.1111/vox.12772.
195. Sampath S, Ramsaran V, Parasram S, Mohammed S, Latchman S, Khunja R, et al. Attitudes towards blood donation in Trinidad and Tobago. *Transfus Med* 2007; 17: 83-87. doi: 10.1111/j.1365-3148.2007.00731.x.
196. Sanabria E. Alleviative bleeding: bloodletting, menstruation and the politics of ignorance in a Brazilian blood donation centre. *Body & Society* 2009; 15: 123-144. doi: 10.1177/1357034X09104112.
197. Sarma S, Roy LS. Awareness about blood donation among medical students in Manipur. *Sch J Appl Med*. 2016; 4: 994-996. doi: 10.36347/sjams.2016.v04i03.072.
198. Satawedín P. Public relations strategies and blood donation in Thailand: a case study of blood donors and non-donors. [University of Leicester; 2011](https://www.le.ac.uk/~u1529821/pubs/Leicester%202011.pdf).

199. Schlumpf KS, Glynn SA, Schreiber GB, Wright DJ, Randolph Steele W, Tu Y, et al. Factors influencing donor return. *Transfusion* 2008; 48: 264-272. doi: 10.1111/j.1537-2995.2007.01519.x.
200. Schreiber GB, Schlumpf KS, Glynn SA, Wright DJ, Tu Y, King MR, et al. Convenience, the bane of our existence, and other barriers to donating. *Transfusion* 2006; 46: 545-553. doi: 10.1111/j.1537-2995.2006.00757.x.
201. Seid T, Dimtsu B, Zemene A, Arage G, Mossisa M, Muche T. Voluntary blood donation practice and its associated factors among health care providers, at Axum town public health facilities Northern Ethiopia: a cross-sectional study. *Curr Res Complement Altern Med* 2017; CRCAM-107. DOI:10.29011/2577-2201/100007.
202. Sekoni A, Balogun M, Odukoya O, Inem V, Onigbogi O. Blood donation practices and willingness to donate among residents of an urban slum in Lagos Nigeria. *Niger Postgrad Med J* 2014; 21: 21-27. PMID: 24887247.
203. Shah R, Tiwari AK, Shah P, Tulsiani S, Harimoorthy V, Choudhury N. Knowledge about HIV-AIDS among first-time and regular voluntary non-remunerated blood donors. *Indian J Pathol Microbiol* 2007; 50: 896-900. PMID: 18306600.
204. Sharma UK, Schreiber GB, Glynn SA, Nass CC, Higgins MJ, Tu Y, et al. Knowledge of HIV/AIDS transmission and screening in United States blood donors. *Transfusion* 2001; 41: 1341-1350. doi: 10.1046/j.1537-2995.2001.41111341.x.
205. Sharma R, Kannan AT, Lukhmana S, Gupta N. The chasm between blood donation intention and action: a study among college students in Delhi, India. *IJDDE* 2012; 11: 255-259. doi: 10.1515/ijdh-2012-0034.
206. James AB, Demmons DG, Schreiber GB, Hillyer CD, Shaz BH. Contribution of attitudinal factors to blood donation in African American church attendees. *Transfusion* 2011; 51: 158-165. doi: 10.1111/j.1537-2995.2010.02775.x.
207. Shaz BH, James AB, Demmons DG, Schreiber GB, Hillyer CD. The African American church as a donation site: motivations and barriers. *Transfusion* 2010; 50: 1240-8. doi: 10.1111/j.1537-2995.2009.02570.x.
208. Shenga N, Pal R, Sengupta S, Pal S. Correlates of voluntary blood donation among people in a hill capital in India. *IJGP* 2009; 3: 167-174. doi: 10.22377/ijgp.v3i2.78.
209. Sojka BN, Sojka P. The blood donation experience: self-reported motives and obstacles for donating blood. *Vox Sang* 2008; 94: 56-63. doi: 10.1111/j.1423-0410.2007.00990.x.
210. Sood R, Yorlets RR, Raykar NP, Menon R, Shah H, Roy N. The global surgery blood drought: frontline provider data on barriers and solutions in Bihar, India. *Global Health Action* 2019; 12: 1599541. doi: 10.1080/16549716.2019.1599541.
211. Sorensen B, Johnsen S, Jorgensen J. Complications related to blood donation: a population-based study. *Vox Sang* 2008; 94: 132-137. doi: 10.1111/j.1423-0410.2007.01000.x.
212. Sørensen B, Jørgensen J, Jensen T, Finnerup N. Pain following blood donation: a questionnaire study of long-term morbidity (LTM) in blood donors. *Vox Sang* 2015; 109: 18-24. doi: 10.1111/vox.12245.
213. Soriano GP. Factors affecting blood donation among experienced and prospective blood donors in Manila, Philippines. [Int J Public Health](#) 2019; 11: 109-116.
214. Srirangamasamy J, Luck C, Balamurugan M, Selvaraju KS, Mayakrishnan R. A study on the knowledge, attitude, and practises regarding voluntary non-remunerated donation of blood among secondary school teachers in Tamilnadu. *J Evolution Med Dent Sci* 2017; 6: 786-789. doi: 10.14260/Jemds/2017/170.
215. Steele WR, High PM, Schreiber GB. AIDS knowledge and beliefs related to blood donation in US adults: results from a national telephone survey (CME). *Transfusion* 2012; 52: 1277-1289. doi: 10.1111/j.1537-2995.2011.03468.x.
216. Suemng A, Konerding U, Hron G, Lubenow N, Alpen U, Hoffmann W, et al. Motivational factors for blood donation in first-time donors and repeat donors: a cross-sectional study in West Pomerania. *Transfus Med* 2017; 27: 413-420. doi: 10.1111/tme.12450.
217. Sweegers MG, Twisk JW, Quee FA, Ferguson E, van den Hurk K. Whole blood donors' post-donation symptoms diminish quickly but are discouraging: Results from 6-day symptom diaries. *Transfusion* 2021; 61: 811-821. doi: 10.1111/trf.16220.
218. Tadesse W, Ayalew Y, Yisma E, Liben ML, Wudu M. Knowledge, attitude, practice and associated factors towards voluntary blood donation among regular health science students of Samara University, Ethiopia. *Health Sci J* 2018; 12. doi: 10.21767/1791-809X.1000542.
219. Tagny CT, Lendem I, Ngo Sack F, Ngo Balogog P, Ninmou C, Dongmo A, et al. Trends in blood donations, blood donors' knowledge, practices and expectations during the COVID-19 pandemic in Cameroon. *Vox Sang* 2021; 116: 637-644. doi: 10.1111/vox.13049.
220. Tahir UF, Hussain A. Awareness and Practice of Blood Donation among the General Population of Karachi. [PJMHS](#) 2017; 11: 781-786.
221. Takanashi M, Odajima T, Aota S, Sudoh M, Yamaga Y, Ono Y, et al. Risk factor analysis of vasovagal reaction from blood donation. *Transfus Apher Sci* 2012; 47: 319-325. doi: 10.1016/j.transci.2012.04.002.
222. Tariq S, Jawed S. Knowledge and attitude of blood donation among female medical students in Faisalabad. *JPMA* 2018; 68: 65-70. PMID: 29371721.
223. Tey YS, Arsil P, Brindal M, Lee SK, Teoh CT. Motivation structures of blood donation: a means-end chain approach. *IJHPM* 2020; 20: 41-54. doi: 10.1007/s10754-019-09269-8.
224. Thaver DH, Masud N, Ashraf M. Are school children ready to donate blood? *J Ayub Med Coll Abbottabad* 2014; 26: 68-70. PMID: 25358222.
225. Thomson C, Currie C, Todd J, Elton R. Changes in HIV/AIDS education, knowledge and attitudes among Scottish 15-16 year olds, 1990-1994: findings from the WHO: Health Behaviour in School-aged Children Study (HBSC). *Health Educ Res* 1999; 14: 357-370. doi: 10.1093/her/14.3.357.
226. Thorpe R, Masser BM, Nguyen L, Davison TE. Understanding donation frequency: insights from current plasma donors. *Vox Sang* 2020; 115: 174-181. doi: 10.1111/vox.12861.
227. Thorpe R, Nguyen L, Masser BM, Van Dyke N, Davison TE. Gone, but haven't forgotten: insights on plasmapheresis donation from lapsed donors. *Vox Sang* 2021; 116: 281-287. doi: 10.1111/vox.13006.
228. Tison GH, Liu C, Ren F, Nelson K, Shan H. Influences of general and traditional Chinese beliefs on the decision to donate blood among employer-organized and volunteer donors in Beijing, China. *Transfusion* 2007; 47: 1871-1879. doi: 10.1111/j.1537-2995.2007.01410.x.
229. Tiwari AK, Aggarwal G, Dara RC, Arora D, Srivastava K, Raina V. Post-donation telephonic interview of blood donors providing an insight into delayed adverse reactions: First attempt in India. *Transfus Apher Sci* 2017; 56: 141-146. doi: 10.1016/j.transci.2016.10.009.
230. Tomasulo P, Bravo M, Kamel H. Time course of vasovagal syncope with whole blood donation. *ISBT Sci Ser* 2010; 5: 52-58. doi: 10.1111/j.1751-2824.2010.01363.x.
231. Trimmel M, Lattacher H, Janda M. Voluntary whole-blood donors, and compensated platelet donors and plasma donors: motivation to donate, altruism and aggression. *Transfus Apher Sci* 2005; 33: 147-155. doi: 10.1016/j.transci.2005.03.011.
232. Ugwu N, Oti W, Ugwu C, Uneke C. Voluntary non-remunerated blood donation: Awareness, perception, and attitude among potential blood donors in Abakaliki, Nigeria. *Niger J Clin Pract* 2019; 22: 1509-1515. doi: 10.4103/njcp.njcp\_159\_19.
233. Uma S, Arun R, Arumugam P. The knowledge, attitude and practice towards blood donation among voluntary blood donors in Chennai, India. *JCDR* 2013; 7: 1043. doi: 10.7860/JCDR/2013/4851.3033.
234. Umeora O, Onuh S, Umeora M. Socio-cultural barriers to voluntary blood donation for obstetric use in a rural Nigerian village. *Afr J Reprod Health* 2005: 72-76. PMID: 16623191.
235. Van Den Hurk K, Peffer K, Habets K, Atsma F, Pasker-de Jong PC, Van Noord PA, et al. Blood donors' physical characteristics are associated with pre-and post-donation symptoms-Donor InSight. *Blood Transfus* 2017; 15: 405. doi: 10.2450/2016.0023-16.
236. van Dongen A, Abraham C, Ruiters RA, Schaalm HP, de Kort WL, Dijkstra JA, et al. Are lapsed donors willing to resume blood donation, and what determines their motivation to do so? *Transfusion* 2012; 52: 1296-1302. doi: 10.1111/j.1537-2995.2011.03447.x.
237. Veerus P, Kullaste R, Pungas K, Aavik T, Lang K. How to reverse first time donors to become regular donors? A questionnaire survey in Estonia. *Transfus Clin Biol* 2017; 24: 404-409. doi: 10.1016/j.traci.2017.06.010.

238. Vossbeck-Elsebusch AN, Gerlach AL. The relation between disgust-sensitivity, blood-injection-injury fears and vasovagal symptoms in blood donors: Disgust sensitivity cannot explain fainting or blood donation-related symptoms. *J Behav Ther Exp Psychiatry* 2012; 43: 607-613. doi: 10.1016/j.jbtep.2011.08.005.
239. Waheed U, Azmat M, Zaheer HA. Knowledge, attitude and practices towards blood donation in Pakistan: a nationwide survey. *Hematol Transfus Int J* 2015; 1: 00018. doi: 10.15406/htij.2015.01.00018.
240. Weidmann C, Klüter H. Blood collection and donor motivation in Germany. *ISBT Sci Ser* 2013; 8: 238-241. doi: 10.1111/vox.12045.
241. Weinberg I, Zarka S, Levy Y, Shinar E. Why would young people donate blood? A survey-based questionnaire study. *Vox Sang* 2009; 96: 128-32. doi: 10.1111/j.1423-0410.2008.01137.x.
242. Wiersum-Osselton J, Prinsze F, van den Brekel E, van Dongen A, Hermans F, Bokhorst A, et al. An intervention study for the prevention of vasovagal reactions and evaluating donors' experience: Analysis of donors' return for subsequent donation. *Vox Sang* 2022; 117: 313-320. doi: 10.1111/vox.13196.
243. Wiersum-Osselton J, Romeijn B, van den Brekel E, van Dongen A, Hermans F, Bokhorst A, et al. Can we prevent vasovagal reactions in young inexperienced whole blood donors? A placebo controlled study comparing effects of a 330 vs 500 mL water drink prior to donation. *Transfusion* 2019; 59: 555-565. doi: 10.1111/trf.15065.
244. Wiwanitkit V. A study on attitude towards blood donation among people in a rural district, Thailand. *Southeast Asian J Trop Med Public Health*. 2000; 31: 609-611. PMID: 11289031.
245. Wiwanitkit V. Knowledge about blood donation among a sample of Thai university students. *Vox Sang* 2002; 83: 97-99. doi: 10.1046/j.1423-0410.2002.00209.x.
246. Yaqoob M, Muneeb A, Babar H. Motivation, misconception and myths related to voluntary blood donation. *Indo Am J Pharm Sci* 2018; 5: 9730-9735. doi: 10.5281/zenodo.1451473.
247. Yeravdekar R, Chandak A, Shukla S. Perception and Practices of Voluntary Blood Donation Amongst Students of Higher Educational Institutes in India. *Online J Health Allied Scs* 2019; 18: 6.
248. Yoshida M, Ando S-i, Eura E, Hayashi A, Kawamura N, Narita S, et al. Hemodynamic response during standing test after blood donation can predict the late phase vasovagal reaction. *Heart and vessels* 2016; 31: 1997-2003. doi: 10.1007/s00380-016-0829-7.
249. Yoshida M, Dan E, Narita S, Momii H, Kadokami T, Andoh Si. Standing Test after the Blood Donation can Predict the Incidence of Late Phase Vasovagal Reaction. *The FASEB Journal* 2010; 24 (Suppl 1): 596.4. doi: 10.1096/fasebj.24.1\_supplement.596.4.
250. Yu C, Lau JT-f, Zhong W, Huang X, Pan C, Chen Y, et al. Why some donors are more willing to donate platelets?---a qualitative study on 25 regular platelet donors in Guangzhou, China. *BMC public health* 2019; 19: 1-8. doi: 10.1186/s12889-019-7783-0.
251. Yuan S, Ziman A, Smeltzer B, Lu Q, Goldfinger D. Moderate and severe adverse events associated with apheresis donations: incidences and risk factors. *Transfusion* 2010; 50: 478-486. doi: 10.1111/j.1537-2995.2009.02443.x.
252. Yuan S, Hoffman M, Lu Q, Goldfinger D, Ziman A. Motivating factors and deterrents for blood donation among donors at a university campus-based collection center. *Transfusion* 2011; 51: 2438-2444. doi: 10.1111/j.1537-2995.2011.03174.x.
253. Zaller N. To donate or not to donate: an analysis of blood donors and blood donation knowledge, attitudes and practices in Northwestern China. the Johns Hopkins University; 2004. ProQuest Number: 3172733. Available at: <https://www.proquest.com/docview/304989223?pq-origsite=primo>. Accessed on 13/05/2021.
254. Zaller N, Nelson KE, Ness P, Wen G, Bai X, Shan H. Knowledge, attitude and practice survey regarding blood donation in a Northwestern Chinese city. *Transfus Med* 2005; 15: 277-286. doi: 10.1111/j.0958-7578.2005.00589.x.
255. Zeiler T, Lander-Kox J, Eichler H, Alt T, Bux J. The safety of blood donation by elderly blood donors. *Vox Sang* 2011; 101: 313-319. doi: 10.1111/j.1423-0410.2011.01492.x.
256. Zito E, Alfieri S, Marconi M, Saturni V, Cremonesi G. Adolescents and blood donation: motivations, hurdles and possible recruitment strategies. *Blood Transfus* 2012; 10: 45. doi: 10.2450/2011.0090-10.
257. Zucoloto ML, Gonzalez TT, Gilchrist PT, Custer B, McFarland W, Martinez EZ. Factors that contribute to blood donation behavior among primary healthcare users: A structural approach. *Transfus Apher Sci* 2019; 58: 663-668. doi: 10.1016/j.transci.2019.08.020.
258. Zucoloto ML, Martinez EZ. Blood Donation Knowledge Questionnaire (BDKQ-Brazil): analysis of items and application in primary healthcare users. *Hematol Transfus Cell Ther* 2018; 40: 368-376. doi: 10.1016/j.htct.2018.03.006.
259. Zucoloto ML, Bueno-Silva CC, Ribeiro-Pizzo LB, Martinez EZ. Knowledge, attitude and practice of blood donation and the role of religious beliefs among health sciences undergraduate students. *Transfus Apher Sci* 2020; 59: 102822. doi: 10.1016/j.htct.2018.03.006.
